# Supplementary material for: Identification of two-dimensional covalent organic frameworks with mcm topology and their application in photocatalytic hydrogen evolution
Source: Royal Society of Chemistry journal article supplement (doi:10.1039/d4sc01780c), 2024-01-01
Supplement: d4sc01780c1.pdf [file d4sc01780c1.pdf]

## Electronic Supplementary Information

### Identification of two-dimensional covalent organic frameworks with mcm topology and their application in photocatalytic hydrogen evolution

Peng-Ju Tian,<sup>‡</sup> Xiang-Hao Han,<sup>‡</sup> Qiao-Yan Qi, and Xin Zhao\*

State Key Laboratory of Organometallic Chemistry, Shanghai Institute of Organic Chemistry, University of Chinese Academy of Sciences, Chinese Academy of Sciences  
345 Lingling Road, Shanghai 200032, China

\*E-mail: xzhao@sioc.ac.cn

#### Table of Contents

|                                                        |         |
|--------------------------------------------------------|---------|
| Section 1. Instruments and Methods .....               | S1-S3   |
| Section 2. Synthetic Procedures .....                  | S3-S7   |
| Section 3. Supplementary Figures .....                 | S8-S19  |
| Section 4. Fractional Atomic Coordinates of COFs ..... | S20-S35 |

## **Instruments and Methods**

### **Fourier-transform infrared spectroscopy (FT-IR)**

Fourier-transform infrared spectroscopy (FT-IR) was carried out a Nicolet iS10 spectrometer. The samples were prepared as KBr pellets.

### **Solid-state nuclear magnetic resonance (NMR) spectroscopy**

The  $^{13}\text{C}$  CP/MAS NMR spectra of the COFs were recorded on an Agilent DD2 600 Solid NMR System with 3.2 mm zirconia rotors. The spinning rate is 8 kHz and the contact time is 3ms.

### **Thermal gravimetric analysis**

Thermal gravimetric analysis was conducted on a NETZSCH STA 449F3 instrument by heating the samples from room temperature to 900 °C under nitrogen atmosphere with a heating rate of 10 °C/min.

### **Powder X-ray diffraction**

Powder X-ray diffraction measurements were carried out with an PANalytical X'Pert Powder system using monochromated Cu/K $\alpha$  ( $\lambda = 0.1542$  nm). The samples were spread on the square recess of a XRD sample holder as thin layers.

### **Structural simulation and powder X-ray diffraction analyses**

Structural simulations were carried out with Materials Studio. The predicted structures were firstly optimized in geometry optimizations by the Forcite molecular dynamics module method, after which the simulated PXRD patterns were determined by Reflex module. Pawley refinement of the experimental PXRD patterns was conducted by the Reflex module.

### **Nitrogen adsorption-desorption isotherm measurement**

The measurements were performed on a Quantachrome autosorb IQ system. The as-prepared samples were activated by degassed for 30 minutes at 100 °C and 300 minutes

at 150 °C, respectively. The isotherms were collected at 77 K under liquid nitrogen bath. The Brunauer-Emmett-Teller (BET) method was utilized to calculate their specific surface areas. By using the quenched solid density functional theory (QSDFT), the pore size distributions were derived from the sorption data.

### **Solid-state UV-Vis diffuse reflectance spectroscopy**

Solid-state UV-Vis diffuse reflectance spectra (DRS) were collected on a Hitachi UH4150 spectrophotometer equipped with integrating sphere with BaSO<sub>4</sub> as a reflectance standard.

### **X-ray photoelectron spectroscopy**

X-ray photoelectron spectroscopy (XPS) was recorded on an ESCALAB 250Xi spectrophotometer with *Al K<sub>α</sub>* radiation. The binding energy scale was calibrated using C 1s peak at 284.60 eV.

### **Transmission electron microscopy**

Transmission electron microscopy (TEM) was performed on a JEOL JEM-2100 instrument.

### **Photoelectrochemical experiment**

The photoelectrochemical measurement experiments were conducted with a CHI 660E electrochemical workstation (Shanghai Chenhua Instrument, China) in a conventional three electrode cell, using a Pt plate as the counter electrode and an Ag/AgCl electrode as the reference electrode. The working electrode was prepared on fluorine doped tin oxide (FTO) glass which was cleaned by sonication in ethanol for 30 min and dried at 353 K. The sample (1 mg) was dispersed in ethanol (1 mL) with a few droplets of 5 wt% Nafion by sonication to get a slurry. The slurry was spread onto pretreated FTO glass then dried in air as the working electrode. The electrolyte was 0.1 M Na<sub>2</sub>SO<sub>4</sub> aqueous solution and the light source was provided by a 300 W Xe-lamp with an ultraviolet cut-

off filter ( $\lambda > 400$  nm).

### Photocatalytic H<sub>2</sub> evolution

A flask was charged with 5 mg COFs powder and 16 mL 0.1M ascorbate acid solution in PBS buffer (0.1 M, PH = 6.0). Then the suspensions were sonicated with a sonic tip (ultrasonic frequency:19-25 kHz) in ice bath for 20 min (period of 2 s with the interval for 2 s) using a power of 150 W. The mixture was transferred into a quartz top-irradiation reactor and 1  $\mu$ L 8 wt% H<sub>2</sub>PtCl<sub>6</sub> was added before the reactor was sealed. The reaction mixture was evacuated several times to ensure complete removal of air and filled with nitrogen, Then the reactor was illuminated with a 300 W Xe light source ( $\lambda > 400$  nm). The temperature of the reaction solution was maintained at room temperature by the flow of cooling water. The evolved gases were analyzed by gas chromatography (Shimadzu GC2014) with helium as the carrier gas. Hydrogen was detected with a thermal conductivity detector (TCD) referencing standard gas with a known concentration of hydrogen.

### Synthetic Procedures

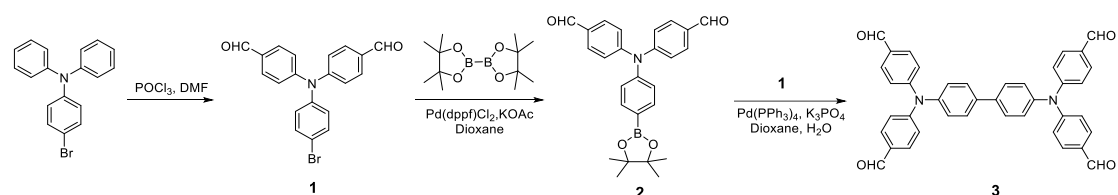

#### 4,4'-((4-bromophenyl)azanediyl)dibenzaldehyde (1)

4-Bromo-*N,N*-diphenylaniline (3.5 g, 10.8 mmol) was dissolved in DMF (25 mL) in a 250 mL flask. Under cooling with ice phosphorus oxychloride (20 mL) was added dropwise with stirring. During this process, precipitate was observed. After the addition was completed, the mixture was heated to 80 °C and stirred at this temperature for 36 h. The mixture was cooled to room temperature, poured into ice (100 g), and extracted with CH<sub>2</sub>Cl<sub>2</sub> (100 mL  $\times$  3). The organic extracts were washed with brine (100 mL $\times$ 2) and water (100 mL), dried with anhydrous Na<sub>2</sub>SO<sub>4</sub>, and concentrated. The residue was

purified by flash column chromatography (petroleum ether/dichloromethane (1/1), silica gel, 300-400 mesh) to give **1** as a light yellow solid (3.6 g, 88 %). <sup>1</sup>H NMR (400 MHz, CDCl<sub>3</sub>, 25 °C): δ 9.90 (s, 2H), 7.78 (d, *J* = 8.5 Hz, 4H), 7.50 (d, *J* = 8.6 Hz, 2H), 7.18 (d, *J* = 8.4 Hz, 4H), 7.05 (d, *J* = 8.6 Hz, 2H).

**4,4'-((4-(4,4,5,5-tetramethyl-1,3,2-dioxaborolan-2-yl)phenyl)azanediyl) dibenzaldehyde (2).**

Compound **1** (13.50 g, 35.5 mmol), bis(pinacolato)diborane (11.00 g, 39.7 mmol), potassium acetate (10.45 g, 106.5 mmol), Pd(dppf)<sub>2</sub>Cl<sub>2</sub> (1.28 g, 1.75 mmol), and dried 1,4-dioxane (200 mL) were added in a 500 mL flask. The mixture was degassed through three freeze-pump-thaw cycles under an argon atmosphere and then stirred at 100 °C for 24 h. After the reaction was completed, the reaction solution was filtered and the solvent was removed under reduced pressure. The residue was purified by flash column chromatography (petroleum ether/ethyl acetate (10/1; 5/1); silica gel, 300-400 mesh) to give **2** as a light yellow solid (14.2 g, 94%). <sup>1</sup>H NMR (400 MHz, CDCl<sub>3</sub>, 25 °C): δ 9.90 (s, 2H), 7.81 (d, *J* = 8.2 Hz, 2H), 7.77 (d, *J* = 8.5 Hz, 4H), 7.19 (d, *J* = 8.5 Hz, 4H), 7.15 (d, *J* = 8.2 Hz, 2H), 1.35 (s, 12H).

**4,4',4'',4'''-([1,1'-biphenyl]-4,4'-diylbis(azanetriyl))tetrabenzaldehyde (BATA, 3).**

To a mixture of 4,4'-((4-bromophenyl)azanediyl)dibenzaldehyde (1.41 g, 3.3 mmol, 1.1 eq), 4,4'-((4-(4,4,5,5-tetramethyl-1,3,2-dioxaborolan-2-yl)phenyl)azanediyl) dibenzaldehyde (1.14 g, 3 mmol, 1 eq), K<sub>3</sub>PO<sub>4</sub> (1.91 g, 9 mmol, 3 eq) and Pd(PPh<sub>3</sub>)<sub>4</sub> (173 mg, 0.15 mmol, 0.05 eq), a degassed mixture of 1,4-dioxane (100 mL) and H<sub>2</sub>O (5 mL) was added. The mixture was heated at 100 °C for 24 h under the protection of nitrogen. After cooling to room temperature, the solvent was removed under vacuum and the residue was purified by flash column chromatography (petroleum ether/dichloromethane/ethyl acetate (5/1/1), silica gel, 300-400 mesh) to give compound **3** a yellow solid (1.73 g, 96%). <sup>1</sup>H NMR (400 MHz, CDCl<sub>3</sub>, 25 °C) : δ 9.86

(s, 4H), 7.83 (d,  $J = 8.6$  Hz, 8H), 7.74 (d,  $J = 8.6$  Hz, 4H), 7.24 (d,  $J = 8.6$  Hz, 4H), 7.19 (d,  $J = 8.6$  Hz, 8H).

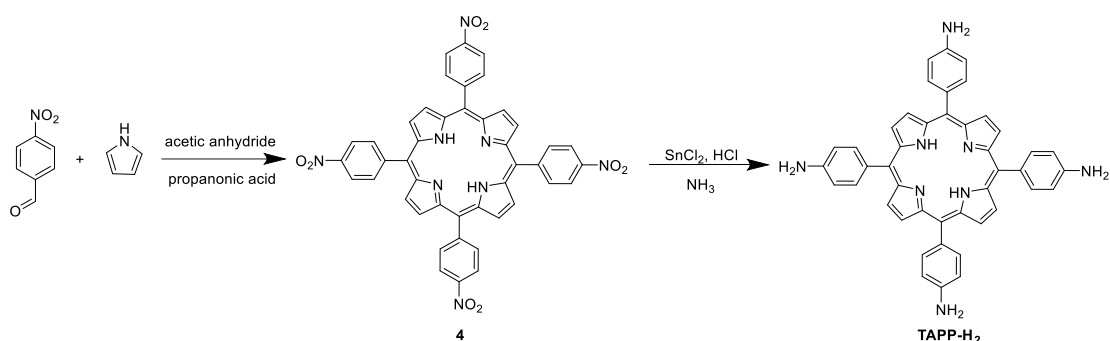

### Tetrakis(4-nitrophenyl)porphyrin (4)

4-nitrobenzaldehyde (22.0 g, 0.145 mol) and acetic anhydride (24 mL, 0.24 mol) were dissolved in 600 mL propanoic acid. The solution was refluxed, to which pyrrole (10.0 mL, 0.144 mol) was added slowly. After refluxing for 30 min, the resulting mixture was cooled to room temperature to give a precipitate which was collected by filtration. The precipitate was washed with water and methanol, respectively, and dried under vacuum. The resulting powder was mixed with pyridine (160 mL) and was refluxed for 1 h. After cooled to room temperature, the precipitate was collected by filtration and washed with acetone, and dried under vacuum to give **4** as a purple solid (5.6 g, 20.8%). MS (MALDI)  $m/z$ : 794.2. Its solubility is extremely poor so <sup>1</sup>H NMR was not conducted.

### tetrakis(4-aminophenyl)porphyrin (TAPP-H<sub>2</sub>)

A mixture of tetrakis(4-nitrophenyl)porphyrin (5.6 g, 7.5 mmol) and SnCl<sub>2</sub>·2H<sub>2</sub>O (28.9 g, 113 mmol) in concentrated HCl (460 mL) was stirred for 30 min at 60 °C. After cooled to room temperature, aqueous ammonia was added to the mixture slowly to deacidification and a dark violet precipitate was obtained. After filtration and dried under vacuum, the raw product was purified by soxhlet extraction with chloroform to give **TAPP-H<sub>2</sub>** as a violet powder (2.8 g, 55.3%). <sup>1</sup>H NMR (400 MHz, DMSO-*d*<sub>6</sub>, 25 °C):  $\delta$  8.84 (s, 8H), 7.81 (d,  $J = 8.2$  Hz, 8H), 6.96 (d,  $J = 8.3$  Hz, 8H), 5.55 (s, 8H), -2.79 (s, 2H).



### **Synthesis of COF-BATA-TAPP-H<sub>2</sub>**

A glass ampoule was charged with BATA (54 mg, 0.09 mmol), TAPP-H<sub>2</sub> (60.7 mg, 0.09 mmol), a mixture of mesitylene (1.4 mL), *n*-butanol (0.6 mL), and acetic acid (6 M (aq.), 0.2 mL). After being degassed through three freeze-pump-thaw cycles, the ampoule was flame-sealed and then heated at 120 °C for three days to afford a purple solid at the bottom of the tube. The solid was collected through filtration and washed three times with tetrahydrofuran, and then followed by Soxhlet extraction with anhydrous THF for 24 h. The resulting powder was dried under dynamic vacuum at 120 °C for 4 h to afford a purple powder (89.4 mg, 83.0%)

### **Synthesis of COF-BATA-TAPP-Ni**

A glass ampoule was charged with BATA ((24.0 mg, 0.04 mmol), TAPP-Ni (29.3 mg, 0.04 mmol), a mixture of mesitylene (0.5 mL), DMAc (0.5 mL) and acetic acid (6 M (aq.), 0.1 mL). After being degassed through three freeze-pump-thaw cycles, the ampoule was flame-sealed and heated at 120 °C for three days to give a purple solid at the bottom of the tube. The solid was collected through filtration and washed three times with tetrahydrofuran, and then followed by Soxhlet extraction with anhydrous THF for 24 h. The resulting powder was dried under dynamic vacuum at 120 °C for 4 h to afford a purple powder (37.6 mg, 74.7%)

### **Synthesis of COF-BATA-TAPP-Zn**

A glass ampoule was charged with BATA ((24.0 mg, 0.04 mmol), TAPP-Zn (29.5 mg, 0.04 mmol), and a mixture of *o*-xylene (0.67 mL), DMAc (1.33 mL) and acetic acid (9 M (aq.), 0.2 mL). After being degassed through three freeze-pump-thaw cycles, the ampoule was flame-sealed and then heated at 120 °C for three days to yield a purple solid at the bottom of the tube. The solid was collected through filtration and washed three times with tetrahydrofuran, and then followed by Soxhlet extraction with anhydrous THF for 24 h. The resulting powder was dried under dynamic vacuum at 120 °C for 4 h to afford a purple powder (25.2 mg, 49.8%).



## Supplementary Figures

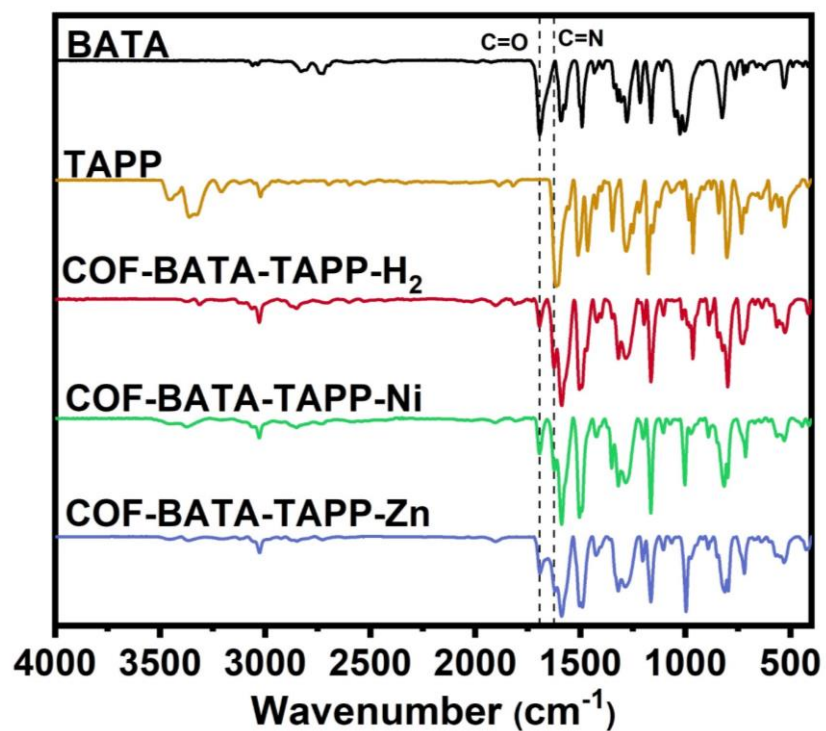

Figure S1. FT-IR spectra of the monomers and the COFs.

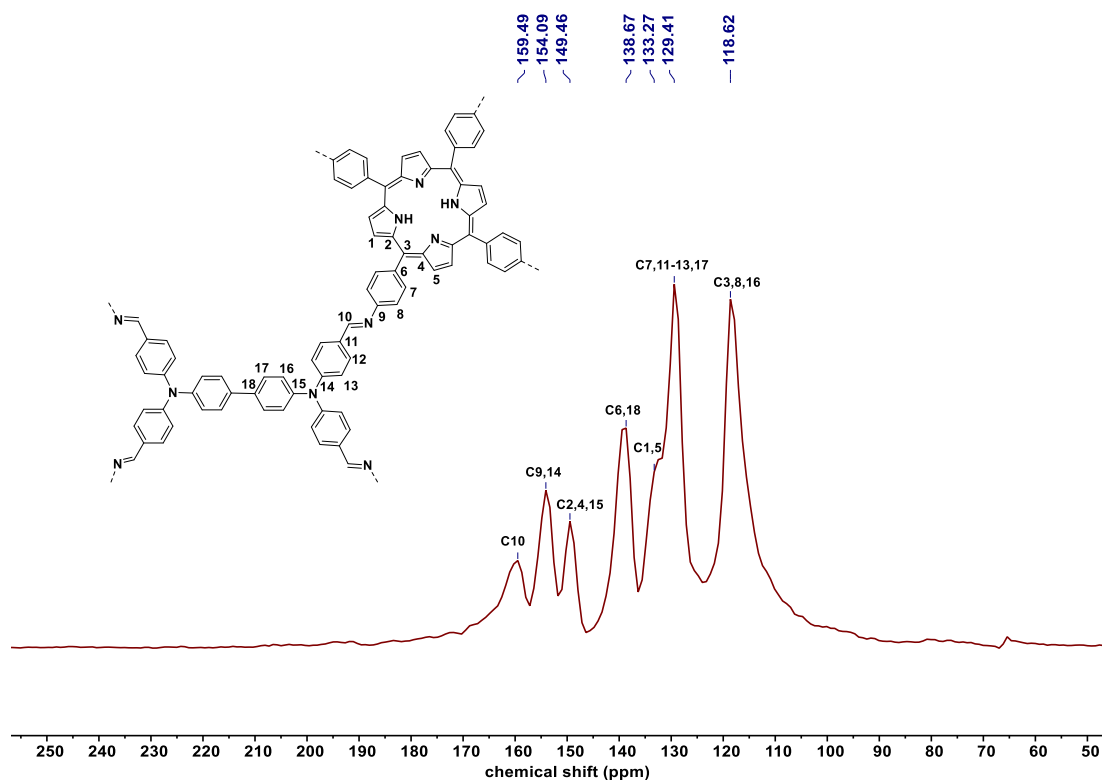

Figure S2. Solid-state <sup>13</sup>C CP/MAS NMR spectrum of COF-BATA-TAPP-H<sub>2</sub>.

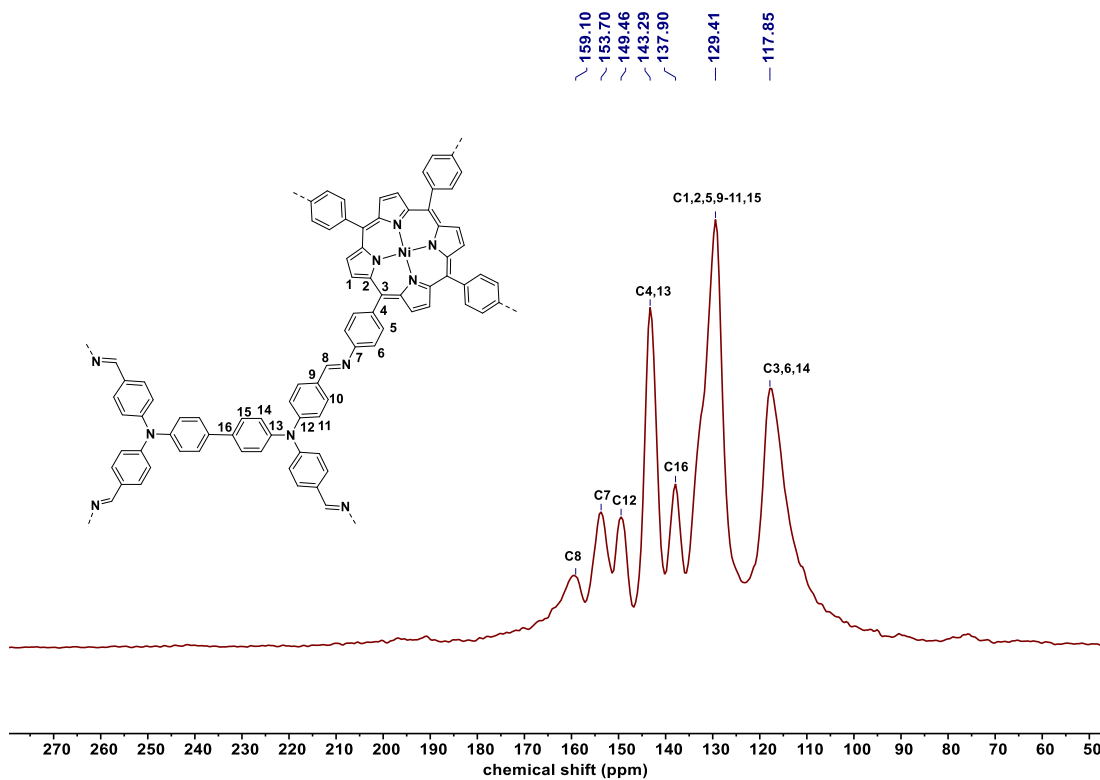

**Figure S3.** Solid-state  $^{13}\text{C}$  CP/MAS NMR spectrum of COF-BATA-TAPP-Ni.

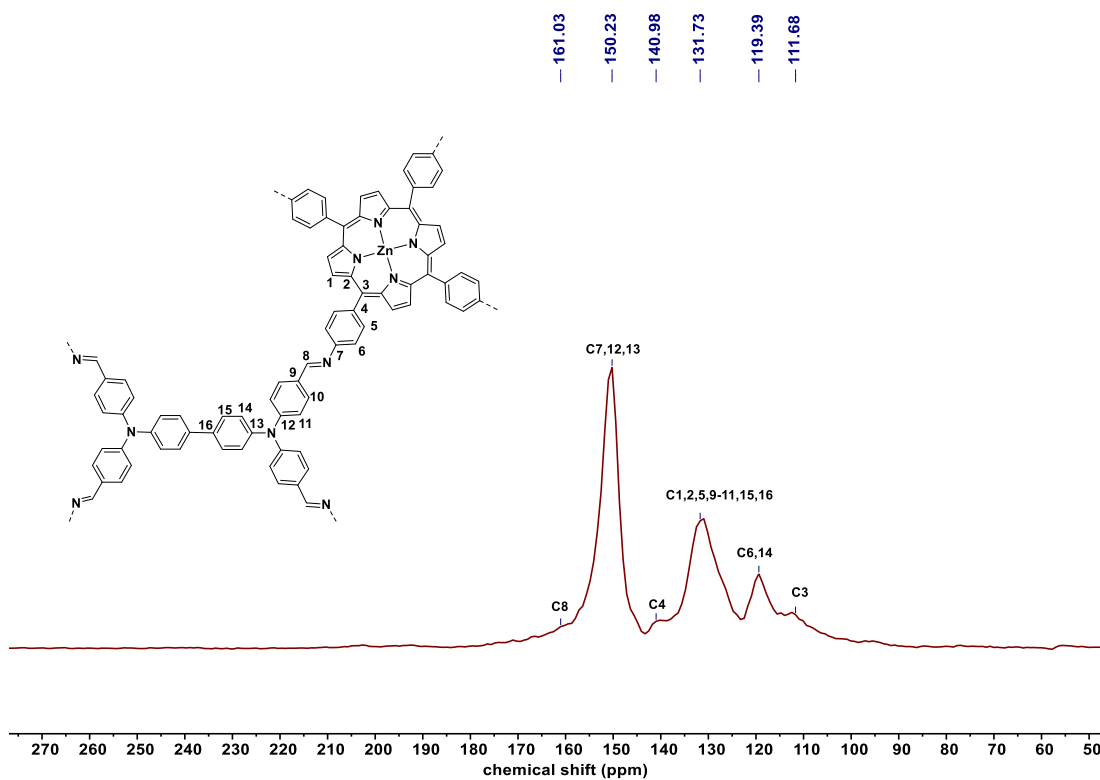

**Figure S4.** Solid-state  $^{13}\text{C}$  CP/MAS NMR spectrum of COF-BATA-TAPP-Zn.

**Table S1.** The metal content of COF-BATA-TAPP-M from XPS measurement

|                           | C (At. %) | N (At. %) | M (At. %) |
|---------------------------|-----------|-----------|-----------|
| COF-BATA-TAPP-Ni (calcd.) | 88.4      | 10.5      | 1.1       |
| COF-BATATAPP-Ni (found)   | 88.7      | 10.1      | 1.2       |
| COF-BATATAPP-Zn (calcd.)  | 88.4      | 10.5      | 1.1       |
| COF-BATATAPP-Zn (found)   | 88.0      | 10.8      | 1.2       |

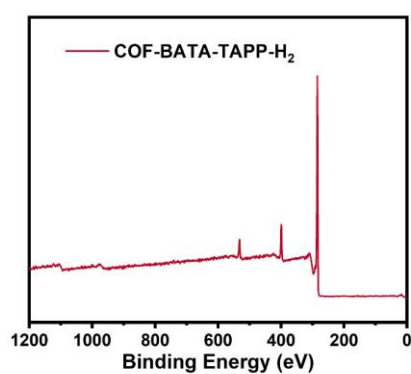

**Figure S5.** XPS survey of COF-BATA-TAPP-H<sub>2</sub>.

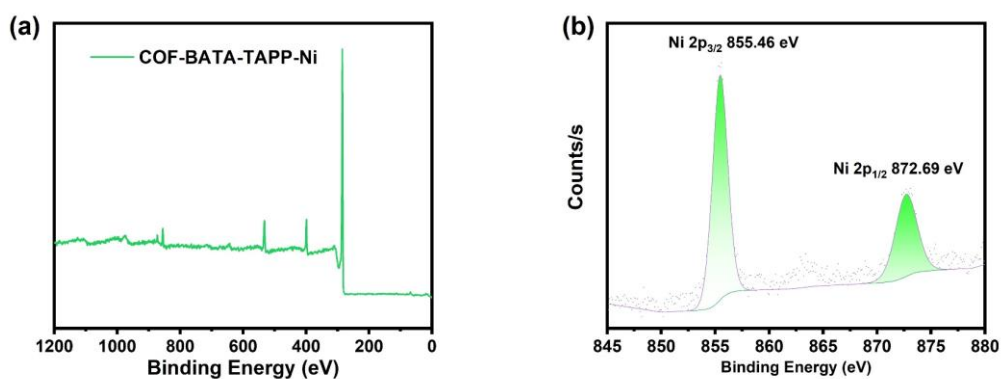

**Figure S6.** (a) XPS survey and (b) high-resolution XPS spectrum of COF-BATA-TAPP-Ni.

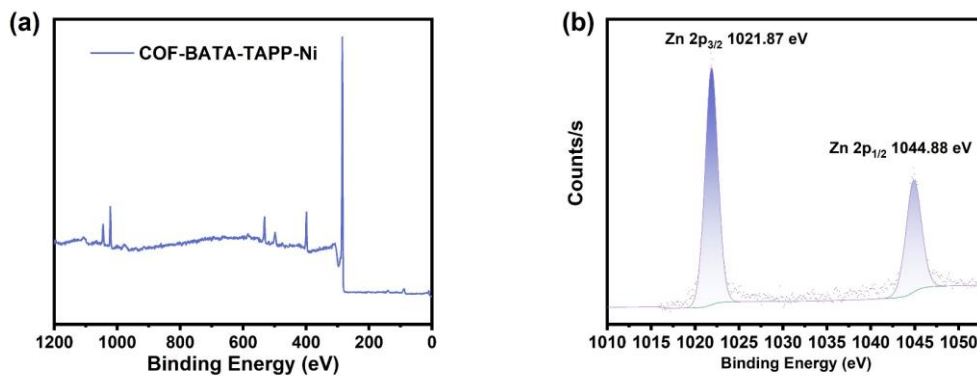

**Figure S7.** (a) XPS survey and (b) high-resolution XPS spectrum of COF-BATA-TAPP-Zn.

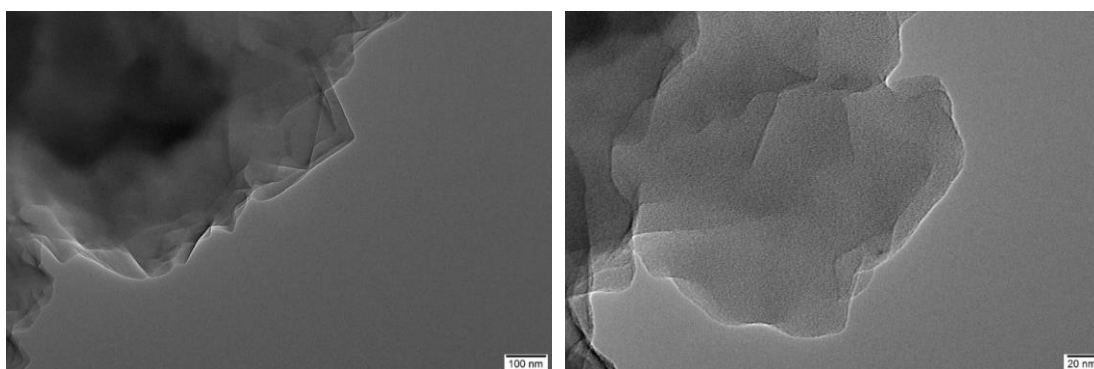

**Figure S8.** TEM images of COF-BATA-TAPP-H<sub>2</sub>.

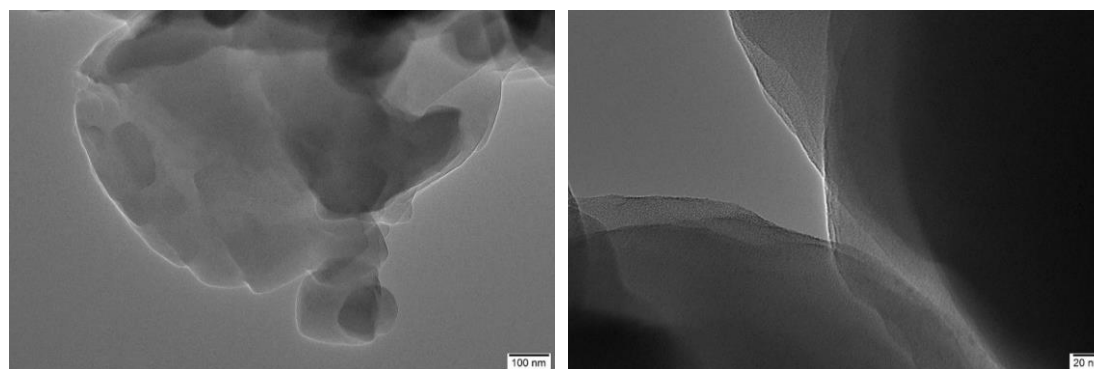

**Figure S9.** TEM images of COF-BATA-TAPP-Ni.

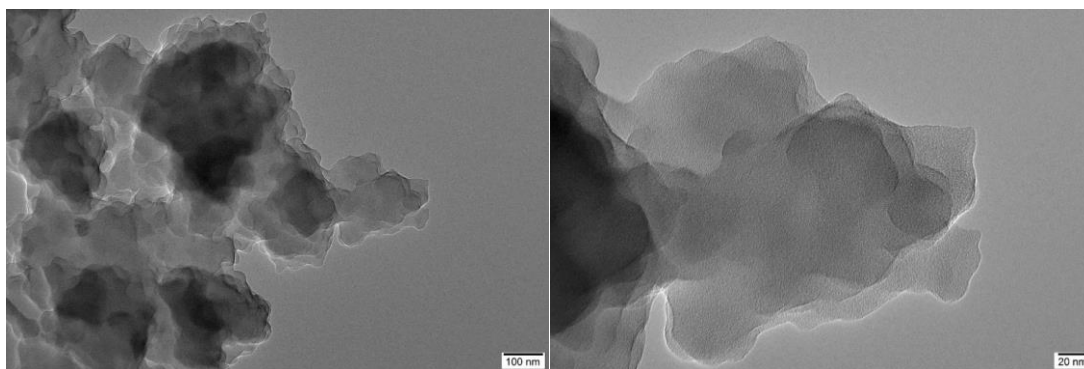

**Figure S10.** TEM images of COF-BATA-TAPP-Zn.

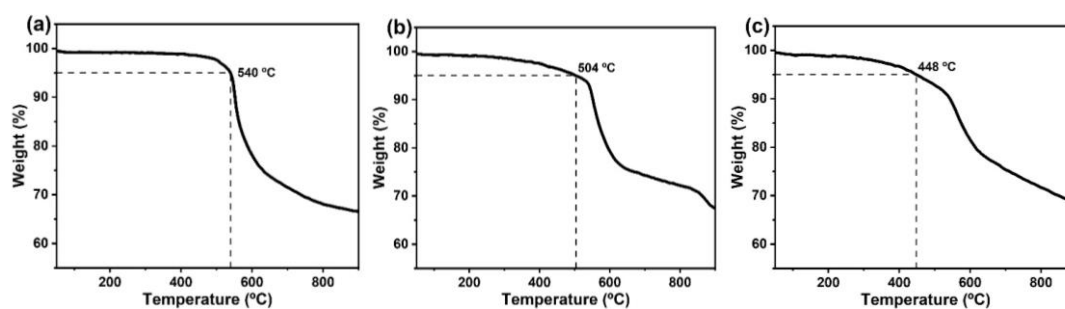

**Figure S11.** TGA profiles of (a) COF-BATA-TAPP-H<sub>2</sub>, (b) COF-BATA-TAPP-Ni, and (c) COF-BATA-TAPP-Zn.

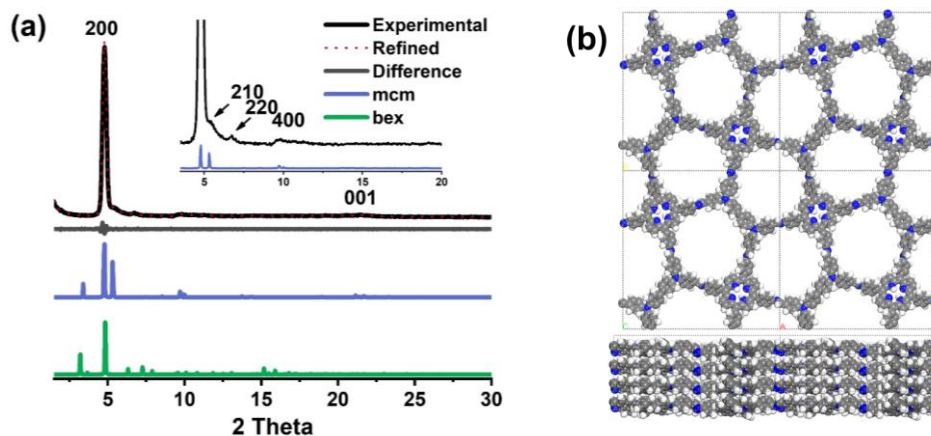

**Figure S12.** (a) Experimental (black) and Pawley refined (red) PXR D patterns, and their difference (gray), and simulated PXR D patterns for COF-BATA-TAPP-H<sub>2</sub> with **mcm** net (blue) and **bex** net (green). (b) Lattice structure of COF-BATA-TAPP-H<sub>2</sub> from top and side view (gray, carbon; white, hydrogen; blue, nitrogen).

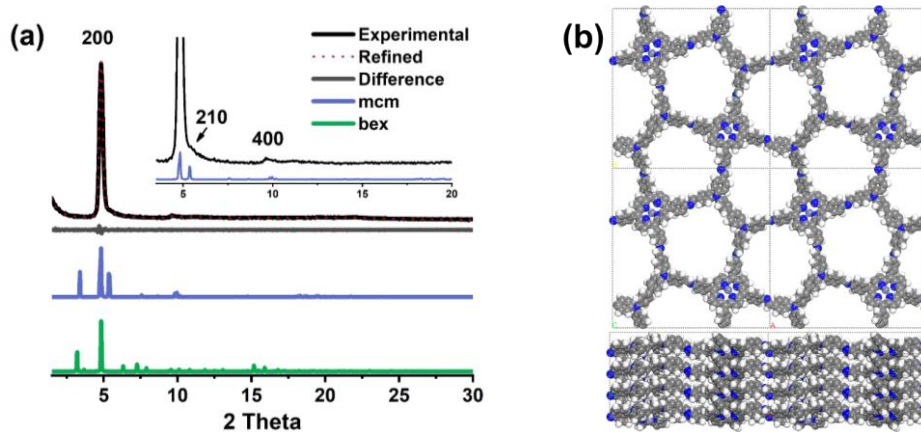

**Figure S13.** (a) Experimental (black) and Pawley refined (red) PXRD patterns, and their difference (gray), and simulated PXRD patterns for COF-BATA-TAPP-Ni with **mcm** net (blue) and **bex** net (green). (b) Lattice structure of COF-BATA-TAPP-Ni from top and side view (gray, carbon and nickel; white, hydrogen; blue, nitrogen).

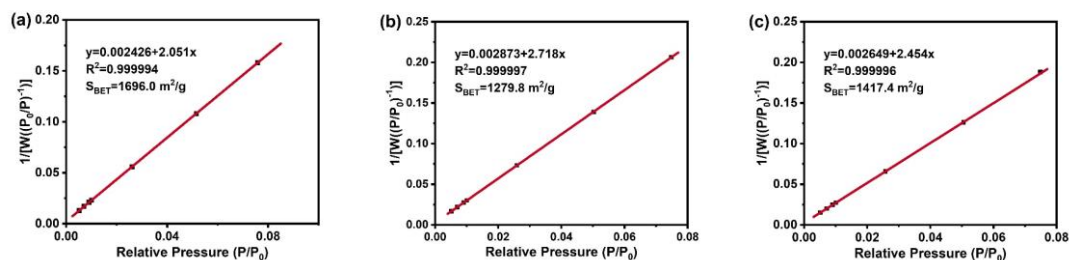

**Figure S14.** BET surface area plots of (a) COF-BATA-TAPP-H<sub>2</sub>, (b) COF-BATA-TAPP-Ni, and (c) COF-BATA-TAPP-Zn.

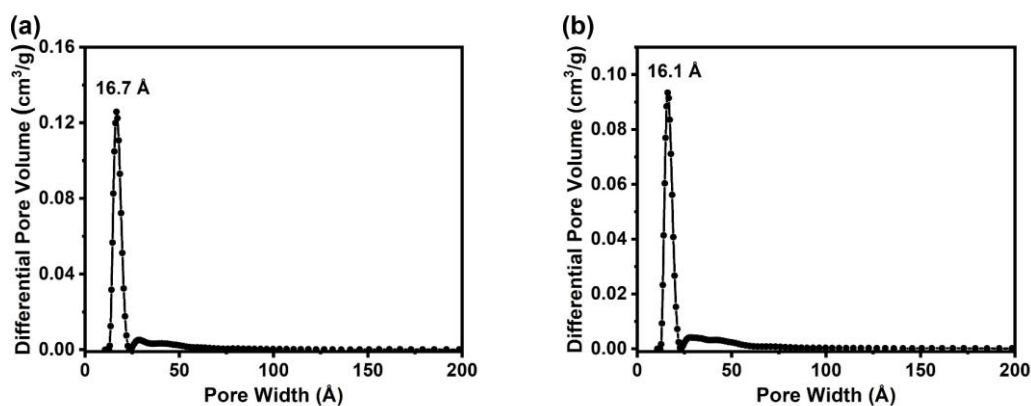

**Figure S15.** Pore size distribution profiles of (a) COF-BATA-TAPP-H<sub>2</sub> and (b) COF-BATA-TAPP-Ni.

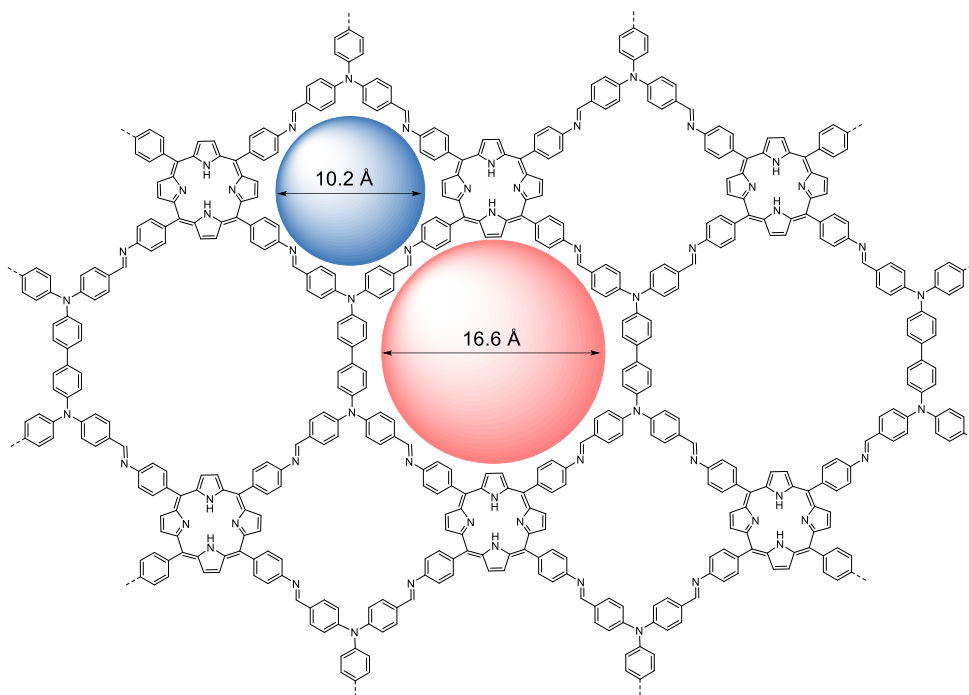

**Figure S16.** Illustration for the structure of the proposed COF with **bex** topology.

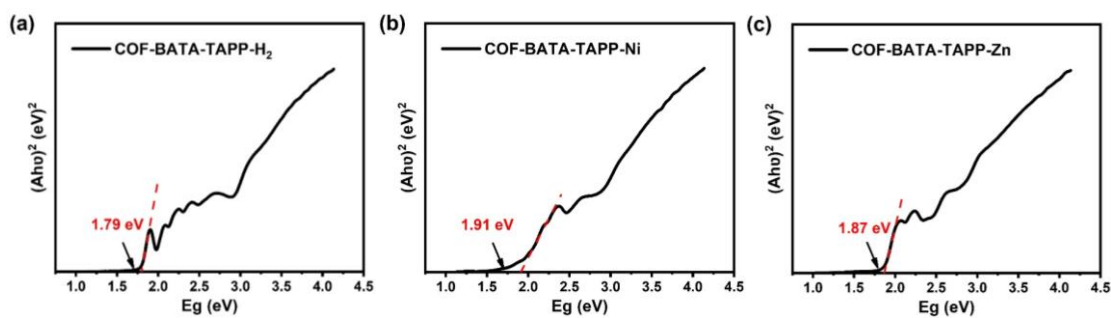

**Figure S17.** Tauc plots of (a) COF-BATA-TAPP-H<sub>2</sub>, (b) COF-BATA-TAPP-Ni, and (c) COF-BATA-TAPP-Zn.

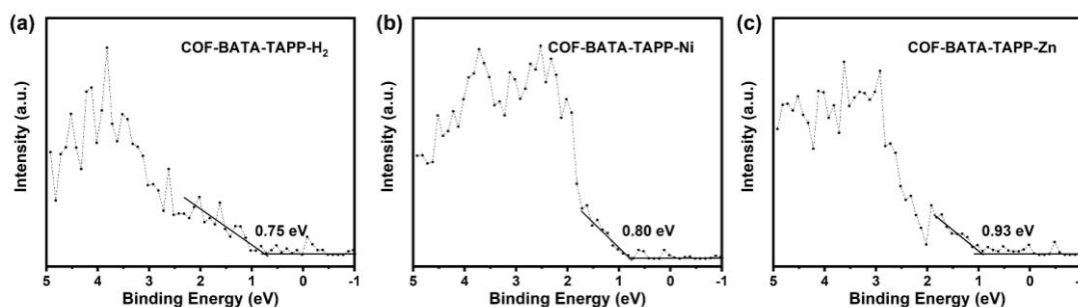

**Figure S18.** Valence band XPS spectra of (a) COF-BATA-TAPP-H<sub>2</sub>, (b) COF-BATA-TAPP-Ni, and (c) COF-BATA-TAPP-Zn. The binding energy scale was calibrated using *C 1s* peak at 284.60 eV.

**Table S2.** Comparison of the results of the HOMO from valence band XPS spectroscopy and the HOMO from Mott-Schottky plots and Tauc plots.

| Samples                      | HOMO vs vacuum<br>(M-S and Tauc) | HOMO vs NHE<br>(M-S and Tauc) | XPS (valence<br>band) vs NHE |
|------------------------------|----------------------------------|-------------------------------|------------------------------|
| COF-BATA-TAPP-H <sub>2</sub> | 5.07                             | 0.63                          | 0.75                         |
| COF-BATATAPP-Ni              | 5.17                             | 0.73                          | 0.80                         |
| COF-BATATAPP-Zn              | 5.36                             | 0.92                          | 0.93                         |

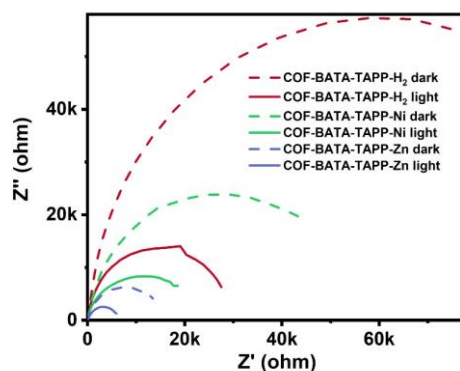

**Figure S19.** Impedance analysis with and without light.

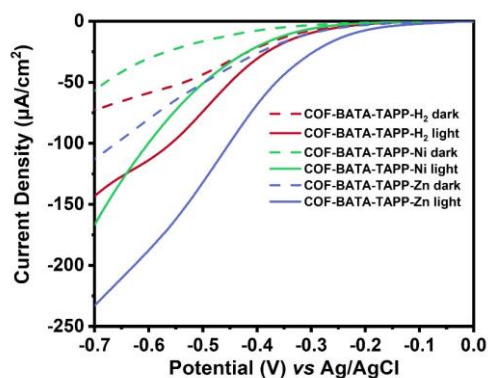

**Figure S20.** LSV curves measured with and without light.



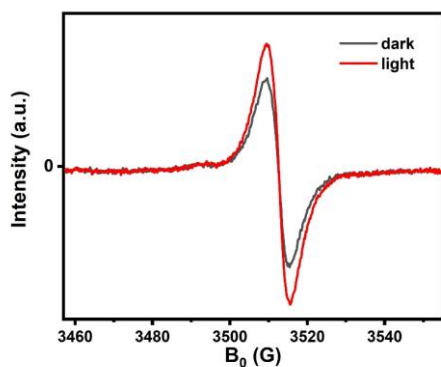

**Figure S21.** EPR spectra of COF-BATA-TAPP-H<sub>2</sub> with and without light.

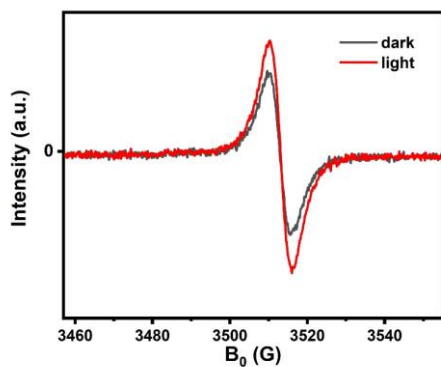

**Figure S22.** EPR spectra of COF-BATA-TAPP-Zn with and without light.

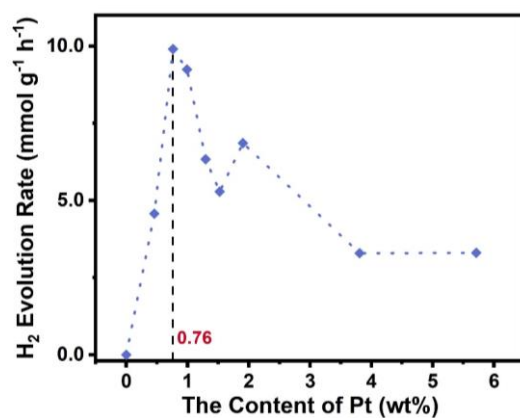

**Figure S23.** H<sub>2</sub> evolution rate of COF-BATA-TAPP-Zn with different amount of Pt.

**Table S3.** Summary of H<sub>2</sub> evolution activity of some COF and POP-based photocatalysts.

| Photocatalysts              | Co-catalyst | Sacrificial reagent | HER (mmol g <sup>-1</sup> h <sup>-1</sup> ) | Ref.                                                          |
|-----------------------------|-------------|---------------------|---------------------------------------------|---------------------------------------------------------------|
| COF-BATA-TAPP-Zn            | 0.76 wt% Pt | ascorbic acid       | 10.0                                        | This work                                                     |
| PCZN-4                      | 15 wt% Pt   | TEOA                | 7.16                                        | <i>Chin. J. Chem.</i> , 2023, <b>41</b> , 2518-.              |
| TzSPy                       | 3 wt% Pt    | TEOA                | 10.3                                        | <i>Polym. Chem.</i> , 2022, <b>13</b> , 5769.                 |
| TzDTDO                      | 3 wt% Pt    | ascorbic acid       | 45.1                                        | <i>Polym. Chem.</i> , 2023, <b>14</b> , 1507.                 |
| PyT-BTDO-2                  | 3 wt% Pt    | ascorbic acid       | 302.29                                      | <i>ACS Appl. Mater. Interfaces</i> , 2023, <b>15</b> , 36404. |
| CMP-1                       | 3 wt% Pt    | TEOA                | 9.7                                         | <i>Front. Chem.</i> , 2022, <b>10</b> , 854018.               |
| COF-954                     | 5 wt% Pt    | ascorbic acid       | 137.226                                     | <i>Adv. Mater.</i> , 2024, <b>36</b> , 2308251.               |
| COF-JLU100                  | 12 wt% Pt   | TEOA                | 107.308                                     | <i>Angew. Chem., Int. Ed.</i> , 2022, <b>61</b> , e202208919. |
| 2.5% g <sub>2</sub> T-T@COF | 3 wt% Pt    | ascorbic acid       | 1.56                                        | <i>J. Mater. Chem. A</i> , 2023, <b>11</b> , 25899-25909.     |
| COF-923                     | 3 wt% Pt    | ascorbic acid       | 7.82                                        | <i>Angew. Chem., Int. Ed.</i> , 2023, <b>62</b> , e202216073. |
| COF-935                     | 3 wt% Pt    | ascorbic acid       | 67.55                                       | <i>Angew. Chem., Int. Ed.</i> , 2023, <b>62</b> , e202304611. |
| N <sub>3</sub> -COF         | 0.68 wt% Pt | TEOA                | 1.7                                         | <i>Nat. Commun.</i> , 2015, <b>6</b> , 8508.                  |
| Tta-Tb                      | 2.2 wt% Pt  | ascorbic acid       | 6.286                                       | <i>ChemSusChem</i> , 2022, <b>15</b> , e202101510.            |
| ZnPor-DETH-COF              | 8 wt% Pt    | TEOA                | 0.413                                       | <i>Nat. Commun.</i> , 2021, <b>12</b> , 1354.                 |
| v-2D-COF-NO1                | 8 wt% Pt    | TEA                 | 1.97                                        | <i>J. Am. Chem. Soc.</i> , 2022, <b>144</b> , 13953.          |

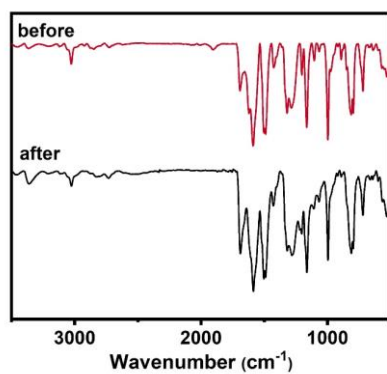

**Figure S24.** FT-IR spectra of COF-BATA-TAPP-Zn before and after 4 h photocatalysis experiment.

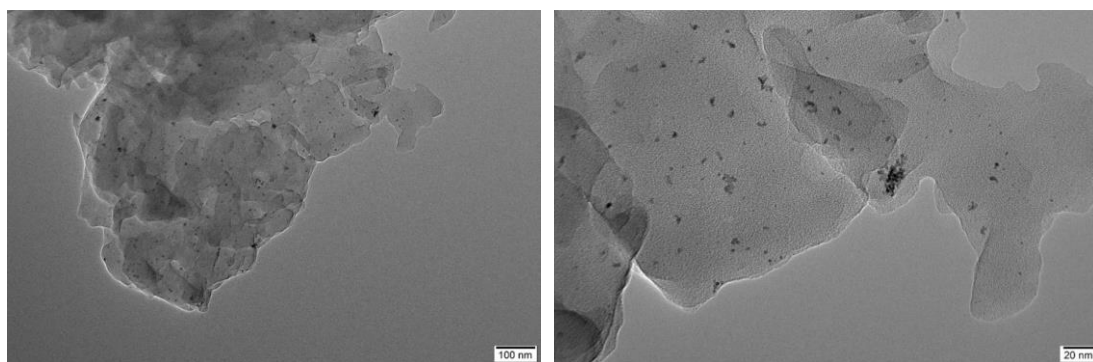

**Figure S25.** TEM images of COF-BATA-TAPP-H<sub>2</sub> after 4 h photocatalysis experiment.

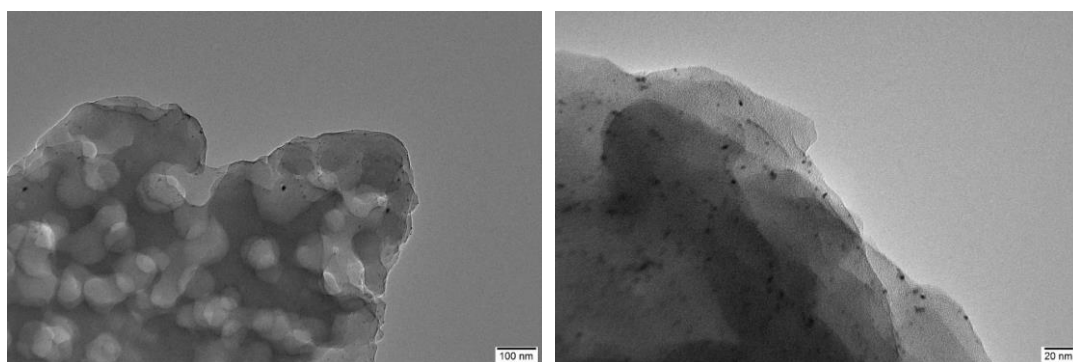

**Figure S26.** TEM images of COF-BATA-TAPP-Ni after 4 h photocatalysis experiment.

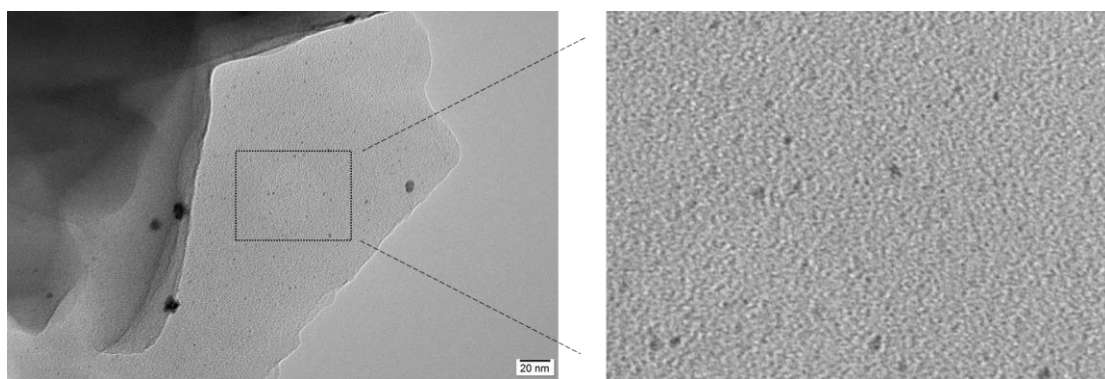

**Figure S27.** TEM images of COF-BATA-TAPP-Zn after 4 h photocatalysis experiment.

## Fractional Atomic Coordinates of COFs

**Table S4.** Fractional atomic coordinates for the unit cell of COF-BATA-TAPP-H<sub>2</sub> with AA stacking.

|                                                                                                                   |         |          |          |      |         |          |          |
|-------------------------------------------------------------------------------------------------------------------|---------|----------|----------|------|---------|----------|----------|
| P1                                                                                                                |         |          |          |      |         |          |          |
| $a = 37.69508 \text{ \AA}, b = 37.96376 \text{ \AA}, c = 4.22048 \text{ \AA}, \alpha = \beta = \gamma = 90^\circ$ |         |          |          |      |         |          |          |
| C1                                                                                                                | 0.72814 | -0.23313 | -1.00755 | C149 | 0.93222 | -0.7905  | -0.53778 |
| C2                                                                                                                | 0.70274 | -0.20699 | -0.97426 | C150 | 0.89637 | -0.78456 | -0.49901 |
| C3                                                                                                                | 0.67619 | -0.20859 | -0.73956 | C151 | 0.59161 | -0.76295 | -1.12587 |
| C4                                                                                                                | 0.67483 | -0.24006 | -0.56274 | C152 | 0.55587 | -0.75549 | -1.10938 |
| C5                                                                                                                | 0.69883 | -0.26718 | -0.60711 | C153 | 0.54211 | -0.7291  | -0.91131 |
| C6                                                                                                                | 0.72782 | -0.26441 | -0.82098 | C154 | 0.56678 | -0.70992 | -0.72964 |
| N7                                                                                                                | 0.65181 | -0.17972 | -0.67895 | C155 | 0.60241 | -0.71797 | -0.72844 |
| C8                                                                                                                | 0.75487 | -0.29132 | -0.84283 | C156 | 0.68952 | -0.91287 | -0.42161 |
| C9                                                                                                                | 0.79057 | -0.28347 | -0.9273  | C157 | 0.68107 | -0.94817 | -0.41935 |
| C10                                                                                                               | 0.81663 | -0.30909 | -0.93822 | C158 | 0.69881 | -0.97295 | -0.60841 |
| C11                                                                                                               | 0.80989 | -0.34448 | -0.85523 | C159 | 0.72584 | -0.96001 | -0.80725 |
| C12                                                                                                               | 0.77466 | -0.35259 | -0.77015 | C160 | 0.73359 | -0.9246  | -0.82798 |
| C13                                                                                                               | 0.74804 | -0.32745 | -0.77491 | N161 | 0.79423 | -0.53824 | -1.07259 |
| N14                                                                                                               | 0.83785 | -0.37079 | -0.85933 | N162 | 0.50498 | -0.72249 | -0.91151 |
| C15                                                                                                               | 0.61505 | -0.18728 | -0.75781 | C163 | 0.80813 | -0.52083 | -0.83616 |
| C16                                                                                                               | 0.66363 | -0.14316 | -0.69823 | C164 | 0.4884  | -0.70635 | -0.68083 |
| C17                                                                                                               | 0.83013 | -0.40816 | -0.8595  | C165 | 0.14167 | 1.77195  | 0.14808  |
| C18                                                                                                               | 0.87427 | -0.36028 | -0.80486 | C166 | 0.16071 | 1.80209  | 0.14286  |
| C19                                                                                                               | 0.85039 | -0.43217 | -0.68123 | C167 | 0.19691 | 1.79354  | 0.12213  |
| C20                                                                                                               | 0.84218 | -0.46791 | -0.67141 | N168 | 0.19805 | 1.75774  | 0.13816  |
| C21                                                                                                               | 0.81477 | -0.48287 | -0.85284 | C169 | 0.16516 | 1.74316  | 0.15928  |
| C22                                                                                                               | 0.79554 | -0.4589  | -1.04066 | C170 | 0.22464 | 1.81832  | 0.07809  |
| C23                                                                                                               | 0.80248 | -0.42278 | -1.04126 | C171 | 0.26049 | 1.80974  | 0.03291  |
| C24                                                                                                               | 0.90281 | -0.37798 | -0.94942 | C172 | 0.29036 | 1.83416  | -0.03173 |

|     |         |          |          |      |         |          |          |
|-----|---------|----------|----------|------|---------|----------|----------|
| C25 | 0.93772 | -0.36663 | -0.91161 | C173 | 0.32034 | 1.81626  | -0.00402 |
| C26 | 0.94698 | -0.33824 | -0.71383 | C174 | 0.31127 | 1.77931  | 0.07562  |
| C27 | 0.91843 | -0.3221  | -0.5555  | N175 | 0.27511 | 1.778    | 0.1197   |
| C28 | 0.88329 | -0.33217 | -0.60351 | C176 | 0.33429 | 1.75203  | 0.16387  |
| C29 | 0.59634 | -0.1678  | -0.9874  | C177 | 0.32371 | 1.71695  | 0.2279   |
| C30 | 0.56039 | -0.17341 | -1.04773 | C178 | 0.34592 | 1.69097  | 0.35862  |
| C31 | 0.54038 | -0.19912 | -0.88729 | C179 | 0.32681 | 1.66123  | 0.40187  |
| C32 | 0.55974 | -0.21982 | -0.67257 | C180 | 0.2921  | 1.66697  | 0.2892   |
| C33 | 0.59563 | -0.21441 | -0.61076 | N181 | 0.29168 | 1.70101  | 0.18934  |
| C34 | 0.64002 | -0.11478 | -0.64841 | C182 | 0.26489 | 1.64146  | 0.29353  |
| C35 | 0.65102 | -0.07974 | -0.66567 | C183 | 0.22871 | 1.64826  | 0.25105  |
| C36 | 0.68596 | -0.07014 | -0.74288 | C184 | 0.19901 | 1.62266  | 0.24026  |
| C37 | 0.70973 | -0.09848 | -0.77379 | C185 | 0.16896 | 1.64064  | 0.22978  |
| C38 | 0.69963 | -0.13336 | -0.72143 | C186 | 0.17785 | 1.67869  | 0.21411  |
| N39 | 0.68907 | -0.00903 | -0.58431 | N187 | 0.2143  | 1.68167  | 0.23593  |
| C40 | 0.69776 | -0.03374 | -0.78544 | C188 | 0.15475 | 1.70736  | 0.18618  |
| N41 | 1.00781 | -0.33163 | -0.8818  | H189 | 0.74881 | -0.2297  | -1.18913 |
| C42 | 0.98343 | -0.32603 | -0.66751 | H190 | 0.70376 | -0.18409 | -1.13494 |
| C43 | 0.19762 | -0.78089 | -0.50636 | H191 | 0.65589 | -0.24302 | -0.36642 |
| C44 | 0.17172 | -0.80669 | -0.52378 | H192 | 0.69679 | -0.29037 | -0.45149 |
| C45 | 0.17751 | -0.83883 | -0.68275 | H193 | 0.79789 | -0.25618 | -0.98517 |
| C46 | 0.21048 | -0.84289 | -0.83603 | H194 | 0.84351 | -0.30111 | -1.01099 |
| C47 | 0.23583 | -0.81656 | -0.83792 | H195 | 0.76763 | -0.37961 | -0.69799 |
| C48 | 0.23097 | -0.78408 | -0.6691  | H196 | 0.72103 | -0.33565 | -0.70919 |
| N49 | 0.151   | -0.8665  | -0.69181 | H197 | 0.87214 | -0.42242 | -0.53074 |
| C50 | 0.25722 | -0.75707 | -0.66673 | H198 | 0.85863 | -0.48456 | -0.5163  |
| C51 | 0.25071 | -0.72263 | -0.79476 | H199 | 0.7737  | -0.46852 | -1.19102 |
| C52 | 0.27622 | -0.69645 | -0.78965 | H200 | 0.78649 | -0.40548 | -1.19517 |
| C53 | 0.31091 | -0.70248 | -0.6766  | H201 | 0.89747 | -0.40029 | -1.10938 |

|     |         |          |          |      |         |          |          |
|-----|---------|----------|----------|------|---------|----------|----------|
| C54 | 0.31808 | -0.73638 | -0.55647 | H202 | 0.95859 | -0.38102 | -1.0406  |
| C55 | 0.29219 | -0.76218 | -0.53927 | H203 | 0.92314 | -0.30011 | -0.39074 |
| N56 | 0.33766 | -0.675   | -0.68651 | H204 | 0.86212 | -0.31835 | -0.47368 |
| C57 | 0.16212 | -0.90304 | -0.68448 | H205 | 0.61037 | -0.14726 | -1.12273 |
| C58 | 0.11359 | -0.85841 | -0.6628  | H206 | 0.5478  | -0.15645 | -1.22703 |
| C59 | 0.37513 | -0.68341 | -0.6864  | H207 | 0.54626 | -0.24092 | -0.53962 |
| C60 | 0.32763 | -0.63846 | -0.6449  | H208 | 0.60732 | -0.23055 | -0.42192 |
| C61 | 0.39992 | -0.66318 | -0.51607 | H209 | 0.61181 | -0.1198  | -0.5966  |
| C62 | 0.43582 | -0.67176 | -0.51062 | H210 | 0.63092 | -0.05908 | -0.62844 |
| C63 | 0.45019 | -0.69954 | -0.68997 | H211 | 0.738   | -0.09348 | -0.82062 |
| C64 | 0.42534 | -0.71906 | -0.86659 | H212 | 0.72075 | -0.15336 | -0.72553 |
| C65 | 0.38901 | -0.712   | -0.85872 | H213 | 0.71553 | -0.02793 | -0.98558 |
| C66 | 0.34666 | -0.61089 | -0.78965 | H214 | 0.98966 | -0.31091 | -0.45236 |
| C67 | 0.33638 | -0.57582 | -0.75705 | H215 | 0.19226 | -0.75675 | -0.37027 |
| C68 | 0.30787 | -0.56538 | -0.5635  | H216 | 0.14665 | -0.8026  | -0.39462 |
| C69 | 0.28978 | -0.59305 | -0.4114  | H217 | 0.21585 | -0.86725 | -0.96914 |
| C70 | 0.29843 | -0.62835 | -0.45877 | H218 | 0.26067 | -0.82064 | -0.96987 |
| C71 | 0.14199 | -0.92985 | -0.82868 | H219 | 0.22446 | -0.71689 | -0.89643 |
| C72 | 0.15363 | -0.96467 | -0.83752 | H220 | 0.26937 | -0.6705  | -0.88866 |
| C73 | 0.1843  | -0.97601 | -0.67764 | H221 | 0.34454 | -0.74224 | -0.45872 |
| C74 | 0.20318 | -0.94936 | -0.51845 | H222 | 0.29893 | -0.78792 | -0.43546 |
| C75 | 0.1935  | -0.91396 | -0.53322 | H223 | 0.39071 | -0.6409  | -0.37059 |
| C76 | 0.09021 | -0.88041 | -0.4947  | H224 | 0.45313 | -0.65514 | -0.36285 |
| C77 | 0.05455 | -0.87194 | -0.45507 | H225 | 0.43444 | -0.74131 | -1.01309 |
| C78 | 0.03864 | -0.84299 | -0.60653 | H226 | 0.37098 | -0.72837 | -1.00194 |
| C79 | 0.06189 | -0.82191 | -0.78631 | H227 | 0.3695  | -0.61708 | -0.94252 |
| C80 | 0.09829 | -0.82842 | -0.80366 | H228 | 0.35206 | -0.55572 | -0.88313 |
| N81 | -0.0180 | -0.8217  | -0.79509 | H229 | 0.26728 | -0.58744 | -0.25297 |
| C82 | 0.00053 | -0.83665 | -0.57094 | H230 | 0.283   | -0.64874 | -0.33469 |

|      |         |          |          |      |          |          |          |
|------|---------|----------|----------|------|----------|----------|----------|
| C83  | 0.21595 | -0.14498 | -0.9194  | H231 | 0.11707  | -0.92311 | -0.94975 |
| C84  | 0.37126 | -0.23975 | -0.82041 | H232 | 0.13716  | -0.98397 | -0.96547 |
| C85  | 0.27544 | -0.39491 | -0.69938 | H233 | 0.22737  | -0.95577 | -0.38425 |
| C86  | 0.11774 | -0.30093 | -0.83539 | H234 | 0.20998  | -0.89441 | -0.40895 |
| C87  | 0.23386 | -0.12048 | -0.7127  | H235 | 0.10058  | -0.90415 | -0.37768 |
| C88  | 0.22619 | -0.08502 | -0.71339 | H236 | 0.03855  | -0.88994 | -0.30863 |
| C89  | 0.19876 | -0.07083 | -0.90017 | H237 | 0.05152  | -0.79867 | -0.91213 |
| C90  | 0.18106 | -0.09417 | -1.10417 | H238 | 0.11507  | -0.81057 | -0.94498 |
| C91  | 0.18993 | -0.12929 | -1.12681 | H239 | -0.01291 | -0.84668 | -0.35779 |
| C92  | 0.39803 | -0.25814 | -1.00078 | H240 | 0.25428  | -0.13056 | -0.55026 |
| C93  | 0.43361 | -0.2505  | -0.96849 | H241 | 0.24132  | -0.06824 | -0.55059 |
| C94  | 0.44575 | -0.2239  | -0.76415 | H242 | 0.16012  | -0.08384 | -1.25982 |
| C95  | 0.4202  | -0.20492 | -0.59347 | H243 | 0.17588  | -0.14612 | -1.29843 |
| C96  | 0.38453 | -0.21206 | -0.61828 | H244 | 0.38979  | -0.27947 | -1.16039 |
| C97  | 0.10408 | -0.32643 | -1.05753 | H245 | 0.45289  | -0.26588 | -1.1063  |
| C98  | 0.06908 | -0.33676 | -1.05381 | H246 | 0.42888  | -0.1843  | -0.42845 |
| C99  | 0.04371 | -0.32067 | -0.85851 | H247 | 0.36559  | -0.19705 | -0.47448 |
| C100 | 0.05587 | -0.29396 | -0.65441 | H248 | 0.12239  | -0.3391  | -1.22565 |
| C101 | 0.09131 | -0.28543 | -0.63076 | H249 | 0.06036  | -0.35719 | -1.22116 |
| C102 | 0.25976 | -0.42025 | -0.48685 | H250 | 0.03746  | -0.28034 | -0.49456 |
| C103 | 0.26751 | -0.45567 | -0.50652 | H251 | 0.09977  | -0.26605 | -0.45169 |
| C104 | 0.29431 | -0.46861 | -0.70745 | H252 | 0.23951  | -0.41136 | -0.3168  |
| C105 | 0.31201 | -0.44387 | -0.89726 | H253 | 0.25308  | -0.47352 | -0.34792 |
| C106 | 0.30332 | -0.40864 | -0.89739 | H254 | 0.33306  | -0.45302 | -1.05765 |
| N107 | 0.48223 | -0.2169  | -0.71734 | H255 | 0.31726  | -0.39072 | -1.05996 |
| N108 | 0.30375 | -0.50472 | -0.73158 | H256 | 0.49037  | -0.19504 | -1.16445 |
| C109 | 0.50234 | -0.20408 | -0.94128 | H257 | 0.28255  | -0.52181 | -0.30052 |
| C110 | 0.29728 | -0.52866 | -0.51678 | H258 | 0.2127   | -1.021   | -0.4672  |
| N111 | 0.18897 | -1.03471 | -0.89813 | H259 | 0.64584  | -0.68677 | -1.15431 |



|      |         |          |          |      |         |          |          |
|------|---------|----------|----------|------|---------|----------|----------|
| C112 | 0.19622 | -1.01267 | -0.66863 | H260 | 0.70499 | -0.65021 | -1.17787 |
| C113 | 0.67171 | -0.69554 | -1.06887 | H261 | 0.84219 | -0.6706  | -0.87785 |
| C114 | 0.70208 | -0.67671 | -1.08003 | H262 | 0.87982 | -0.72903 | -0.78854 |
| C115 | 0.72962 | -0.69706 | -0.94839 | H263 | 0.84174 | -0.86117 | -0.46699 |
| N116 | 0.71427 | -0.72819 | -0.86691 | H264 | 0.78243 | -0.8975  | -0.43543 |
| C117 | 0.67901 | -0.72876 | -0.93554 | H265 | 0.64481 | -0.8767  | -0.72599 |
| C118 | 0.76529 | -0.68574 | -0.93089 | H266 | 0.60729 | -0.81832 | -0.82139 |
| C119 | 0.79451 | -0.70725 | -0.86488 | H267 | 0.81185 | -0.65393 | -1.34527 |
| C120 | 0.83255 | -0.69731 | -0.85038 | H268 | 0.8254  | -0.5913  | -1.38236 |
| C121 | 0.85125 | -0.72635 | -0.80347 | H269 | 0.74561 | -0.56781 | -0.68094 |
| C122 | 0.82607 | -0.75614 | -0.76868 | H270 | 0.73338 | -0.63054 | -0.61416 |
| N123 | 0.79225 | -0.74307 | -0.81254 | H271 | 0.86576 | -0.84381 | -1.04924 |
| C124 | 0.83363 | -0.79154 | -0.70494 | H272 | 0.92922 | -0.85565 | -1.08914 |
| C125 | 0.80819 | -0.81868 | -0.67241 | H273 | 0.95106 | -0.77544 | -0.3924  |
| C126 | 0.81568 | -0.85216 | -0.54544 | H274 | 0.88759 | -0.76442 | -0.32872 |
| C127 | 0.78524 | -0.87086 | -0.53003 | H275 | 0.60082 | -0.78361 | -1.28906 |
| C128 | 0.75749 | -0.85027 | -0.65494 | H276 | 0.53755 | -0.77013 | -1.26336 |
| N129 | 0.77278 | -0.81906 | -0.73528 | H277 | 0.55807 | -0.68835 | -0.57507 |
| C130 | 0.72178 | -0.86157 | -0.67098 | H278 | 0.62038 | -0.70316 | -0.57273 |
| C131 | 0.69252 | -0.84002 | -0.73519 | H279 | 0.67516 | -0.89489 | -0.26261 |
| C132 | 0.65451 | -0.84999 | -0.753   | H280 | 0.66047 | -0.95748 | -0.25508 |
| C133 | 0.63584 | -0.82098 | -0.80282 | H281 | 0.74095 | -0.9779  | -0.9603  |
| C134 | 0.66103 | -0.79119 | -0.83534 | H282 | 0.75391 | -0.91562 | -0.99678 |
| N135 | 0.69485 | -0.80424 | -0.79016 | H283 | 0.81717 | -0.53516 | -0.62474 |
| C136 | 0.65356 | -0.75589 | -0.90394 | H284 | 0.50331 | -0.69626 | -0.47612 |
| C137 | 0.7721  | -0.6488  | -0.9671  | H285 | 0.11273 | 1.77071  | 0.15092  |
| C138 | 0.87042 | -0.80124 | -0.70132 | H286 | 0.14941 | 1.82859  | 0.14147  |
| C139 | 0.715   | -0.89861 | -0.64208 | H287 | 0.28668 | 1.86172  | -0.08997 |
| C140 | 0.61683 | -0.74615 | -0.91761 | H288 | 0.34734 | 1.82555  | -0.03167 |

|      |         |          |          |      |         |          |          |
|------|---------|----------|----------|------|---------|----------|----------|
| C141 | 0.79754 | -0.63531 | -1.19199 | H289 | 0.37385 | 1.69449  | 0.41968  |
| C142 | 0.80525 | -0.59993 | -1.21138 | H290 | 0.3366  | 1.6366   | 0.50365  |
| C143 | 0.78684 | -0.57459 | -1.03374 | H291 | 0.20244 | 1.59433  | 0.24395  |
| C144 | 0.76066 | -0.58684 | -0.82401 | H292 | 0.14212 | 1.6304   | 0.22974  |
| C145 | 0.75357 | -0.62222 | -0.78685 | H293 | 0.72749 | -0.7486  | -0.77598 |
| C146 | 0.88425 | -0.82904 | -0.89849 | H294 | 0.75939 | -0.79848 | -0.82113 |
| C147 | 0.92012 | -0.83538 | -0.92246 | H295 | 0.22048 | 1.74378  | 0.1415   |
| C148 | 0.9452  | -0.81594 | -0.74988 | H296 | 0.27008 | 1.71328  | 0.10925  |

**Table S5.** Fractional atomic coordinates for the unit cell of COF-BATA-TAPP-Ni with AA stacking.

|                                                                                                                   |         |          |          |      |         |          |          |
|-------------------------------------------------------------------------------------------------------------------|---------|----------|----------|------|---------|----------|----------|
| P1                                                                                                                |         |          |          |      |         |          |          |
| $a = 37.65926 \text{ \AA}, b = 37.42621 \text{ \AA}, c = 4.95061 \text{ \AA}, \alpha = \beta = \gamma = 90^\circ$ |         |          |          |      |         |          |          |
| C1                                                                                                                | 0.72491 | -0.23557 | -1.03887 | C148 | 0.94456 | -0.81276 | -0.64053 |
| C2                                                                                                                | 0.69896 | -0.20869 | -1.00347 | C149 | 0.92898 | -0.78939 | -0.45128 |
| C3                                                                                                                | 0.67541 | -0.20893 | -0.78126 | C150 | 0.8921  | -0.78242 | -0.45354 |
| C4                                                                                                                | 0.67802 | -0.23839 | -0.6043  | C151 | 0.58884 | -0.76093 | -1.0255  |
| C5                                                                                                                | 0.70342 | -0.2656  | -0.64223 | C152 | 0.55245 | -0.75174 | -1.01002 |
| C6                                                                                                                | 0.72821 | -0.26488 | -0.85816 | C153 | 0.53967 | -0.72773 | -0.81275 |
| N7                                                                                                                | 0.65265 | -0.18069 | -0.73725 | C154 | 0.56506 | -0.71193 | -0.63871 |
| C8                                                                                                                | 0.75521 | -0.2916  | -0.88474 | C155 | 0.60134 | -0.72117 | -0.65271 |
| C9                                                                                                                | 0.78872 | -0.28419 | -1.00362 | C156 | 0.69218 | -0.91329 | -0.36953 |
| C10                                                                                                               | 0.81592 | -0.31009 | -1.01692 | C157 | 0.68391 | -0.95006 | -0.35427 |
| C11                                                                                                               | 0.81198 | -0.34481 | -0.90584 | C158 | 0.69811 | -0.97466 | -0.54065 |
| C12                                                                                                               | 0.77822 | -0.35241 | -0.79257 | C159 | 0.7208  | -0.96129 | -0.74433 |
| C13                                                                                                               | 0.75059 | -0.32698 | -0.78705 | C160 | 0.72784 | -0.92437 | -0.76667 |
| N14                                                                                                               | 0.83968 | -0.36927 | -0.89988 | N161 | 0.79503 | -0.53845 | -1.05239 |
| C15                                                                                                               | 0.61718 | -0.1869  | -0.7879  | N162 | 0.5039  | -0.72159 | -0.80235 |
| C16                                                                                                               | 0.66544 | -0.14671 | -0.67228 | C163 | 0.80572 | -0.51677 | -0.84775 |
| C17                                                                                                               | 0.83311 | -0.40555 | -0.90394 | C164 | 0.48442 | -0.70335 | -0.61606 |

|     |         |          |          |      |         |          |          |
|-----|---------|----------|----------|------|---------|----------|----------|
| C18 | 0.87422 | -0.35764 | -0.86896 | C165 | 0.15032 | 1.77099  | 0.14093  |
| C19 | 0.84838 | -0.42847 | -0.70841 | C166 | 0.17077 | 1.80096  | 0.13275  |
| C20 | 0.8397  | -0.46504 | -0.69521 | C167 | 0.20562 | 1.79118  | 0.07543  |
| C21 | 0.81536 | -0.4805  | -0.8788  | N168 | 0.20615 | 1.75389  | 0.06279  |
| C22 | 0.80109 | -0.45821 | -1.08235 | C169 | 0.17192 | 1.74096  | 0.11227  |
| C23 | 0.80982 | -0.42146 | -1.09398 | C170 | 0.23112 | 1.81926  | 0.03507  |
| C24 | 0.90233 | -0.36985 | -1.03509 | C171 | 0.26746 | 1.81216  | 0.00814  |
| C25 | 0.93752 | -0.35748 | -1.00029 | C172 | 0.29443 | 1.83195  | -0.11433 |
| C26 | 0.94609 | -0.3324  | -0.79622 | C173 | 0.32534 | 1.81209  | -0.0901  |
| C27 | 0.91805 | -0.32037 | -0.62869 | C174 | 0.31653 | 1.78098  | 0.05029  |
| C28 | 0.88307 | -0.33287 | -0.6639  | N175 | 0.2824  | 1.7834   | 0.11492  |
| C29 | 0.60004 | -0.16924 | -1.00451 | C176 | 0.33726 | 1.75159  | 0.12771  |
| C30 | 0.56324 | -0.17302 | -1.05194 | C177 | 0.32056 | 1.71894  | 0.21139  |
| C31 | 0.54224 | -0.19601 | -0.89073 | C178 | 0.34024 | 1.69506  | 0.36699  |
| C32 | 0.5594  | -0.21496 | -0.68138 | C179 | 0.32024 | 1.66521  | 0.41107  |
| C33 | 0.59586 | -0.20986 | -0.62819 | C180 | 0.28758 | 1.66961  | 0.28287  |
| C34 | 0.64283 | -0.11683 | -0.62306 | N181 | 0.28724 | 1.70364  | 0.16973  |
| C35 | 0.6558  | -0.08161 | -0.58966 | C182 | 0.26322 | 1.64023  | 0.28682  |
| C36 | 0.69255 | -0.07423 | -0.60086 | C183 | 0.22655 | 1.64509  | 0.24995  |
| C37 | 0.71563 | -0.10381 | -0.62415 | C184 | 0.19967 | 1.6201   | 0.2061   |
| C38 | 0.70238 | -0.13881 | -0.65348 | C185 | 0.1685  | 1.639    | 0.16906  |
| N39 | 0.68841 | -0.00962 | -0.52054 | C186 | 0.17692 | 1.67537  | 0.18021  |
| C40 | 0.70664 | -0.03918 | -0.59876 | N187 | 0.211   | 1.67699  | 0.24966  |
| N41 | 1.00908 | -0.32704 | -0.91466 | C188 | 0.15609 | 1.706    | 0.13294  |
| C42 | 0.98092 | -0.31939 | -0.75282 | H189 | 0.74141 | -0.23335 | -1.20184 |
| C43 | 0.19759 | -0.78325 | -0.50217 | H190 | 0.69755 | -0.18815 | -1.13941 |
| C44 | 0.17128 | -0.81019 | -0.51743 | H191 | 0.66205 | -0.23992 | -0.4391  |
| C45 | 0.17342 | -0.83837 | -0.7081  | H192 | 0.70408 | -0.28559 | -0.50165 |
| C46 | 0.20298 | -0.83774 | -0.88569 | H193 | 0.79424 | -0.2594  | -1.07906 |

|     |         |          |          |      |         |          |          |
|-----|---------|----------|----------|------|---------|----------|----------|
| C47 | 0.22955 | -0.81127 | -0.86981 | H194 | 0.83934 | -0.30304 | -1.10591 |
| C48 | 0.22739 | -0.78369 | -0.67619 | H195 | 0.77346 | -0.37689 | -0.70888 |
| N49 | 0.14903 | -0.86602 | -0.71484 | H196 | 0.72681 | -0.33493 | -0.70788 |
| C50 | 0.25436 | -0.75743 | -0.66134 | H197 | 0.86564 | -0.41831 | -0.5691  |
| C51 | 0.24929 | -0.72343 | -0.77789 | H198 | 0.85123 | -0.48031 | -0.54736 |
| C52 | 0.2763  | -0.69736 | -0.767   | H199 | 0.7838  | -0.46858 | -1.22138 |
| C53 | 0.30957 | -0.70357 | -0.63947 | H200 | 0.79878 | -0.40596 | -1.24174 |
| C54 | 0.31411 | -0.73796 | -0.52316 | H201 | 0.8971  | -0.38789 | -1.1846  |
| C55 | 0.28728 | -0.76437 | -0.53431 | H202 | 0.95702 | -0.36693 | -1.12556 |
| N56 | 0.33534 | -0.67716 | -0.62247 | H203 | 0.92282 | -0.30232 | -0.47733 |
| C57 | 0.16213 | -0.90044 | -0.73027 | H204 | 0.86368 | -0.32385 | -0.53705 |
| C58 | 0.11263 | -0.8604  | -0.69959 | H205 | 0.61459 | -0.15292 | -1.12752 |
| C59 | 0.37126 | -0.68482 | -0.62318 | H206 | 0.55192 | -0.15892 | -1.20691 |
| C60 | 0.32529 | -0.64188 | -0.59323 | H207 | 0.54514 | -0.232   | -0.56094 |
| C61 | 0.39434 | -0.66872 | -0.4328  | H208 | 0.60638 | -0.22268 | -0.46594 |
| C62 | 0.43119 | -0.67503 | -0.43338 | H209 | 0.61598 | -0.12023 | -0.61404 |
| C63 | 0.44713 | -0.69816 | -0.62446 | H210 | 0.63814 | -0.06113 | -0.56234 |
| C64 | 0.42428 | -0.7149  | -0.8133  | H211 | 0.74258 | -0.10012 | -0.62223 |
| C65 | 0.38719 | -0.70834 | -0.81224 | H212 | 0.72081 | -0.15869 | -0.66478 |
| C66 | 0.33929 | -0.61428 | -0.75744 | H213 | 0.73233 | -0.03591 | -0.66186 |
| C67 | 0.32912 | -0.57824 | -0.72207 | H214 | 0.98499 | -0.30333 | -0.58862 |
| C68 | 0.30445 | -0.56829 | -0.51982 | H215 | 0.19507 | -0.76345 | -0.36071 |
| C69 | 0.29039 | -0.59583 | -0.35547 | H216 | 0.15053 | -0.80953 | -0.38449 |
| C70 | 0.30069 | -0.63171 | -0.3918  | H217 | 0.20546 | -0.85713 | -1.02896 |
| C71 | 0.1497  | -0.92543 | -0.92329 | H218 | 0.2505  | -0.81223 | -1.00152 |
| C72 | 0.16254 | -0.96093 | -0.93098 | H219 | 0.22585 | -0.71743 | -0.87239 |
| C73 | 0.18861 | -0.97279 | -0.74568 | H220 | 0.27123 | -0.67314 | -0.85281 |
| C74 | 0.20152 | -0.94768 | -0.55561 | H221 | 0.33726 | -0.74394 | -0.42557 |
| C75 | 0.18851 | -0.91244 | -0.54842 | H222 | 0.29188 | -0.78878 | -0.44776 |

|      |          |          |          |      |          |          |          |
|------|----------|----------|----------|------|----------|----------|----------|
| C76  | 0.08961  | -0.88589 | -0.57827 | H223 | 0.38418  | -0.65196 | -0.28968 |
| C77  | 0.05243  | -0.8817  | -0.57316 | H224 | 0.44636  | -0.66237 | -0.29057 |
| C78  | 0.03613  | -0.85098 | -0.68283 | H225 | 0.43467  | -0.732   | -0.95413 |
| C79  | 0.05853  | -0.82452 | -0.7949  | H226 | 0.3716   | -0.7206  | -0.95348 |
| C80  | 0.09581  | -0.82946 | -0.80602 | H227 | 0.35709  | -0.62048 | -0.90552 |
| N81  | -0.01966 | -0.81806 | -0.63116 | H228 | 0.33986  | -0.55917 | -0.84592 |
| C82  | -0.00131 | -0.84849 | -0.68434 | H229 | 0.27243  | -0.59006 | -0.2063  |
| C83  | 0.22215  | -0.14368 | -0.96385 | H230 | 0.29018  | -0.6508  | -0.26883 |
| C84  | 0.3749   | -0.24346 | -0.87254 | H231 | 0.13091  | -0.91766 | -1.05968 |
| C85  | 0.27501  | -0.39568 | -0.6764  | H232 | 0.15265  | -0.97821 | -1.07264 |
| C86  | 0.11866  | -0.30026 | -0.8823  | H233 | 0.22052  | -0.95485 | -0.4177  |
| C87  | 0.23735  | -0.1211  | -0.76565 | H234 | 0.19827  | -0.89535 | -0.40637 |
| C88  | 0.22868  | -0.0846  | -0.75036 | H235 | 0.09986  | -0.90842 | -0.49235 |
| C89  | 0.20386  | -0.06908 | -0.92985 | H236 | 0.03731  | -0.9014  | -0.48716 |
| C90  | 0.18904  | -0.09137 | -1.13057 | H237 | 0.04762  | -0.80178 | -0.87443 |
| C91  | 0.19814  | -0.12798 | -1.1492  | H238 | 0.11083  | -0.81015 | -0.89654 |
| C92  | 0.39801  | -0.26763 | -1.0055  | H239 | -0.01534 | -0.87147 | -0.71973 |
| C93  | 0.43518  | -0.26251 | -1.0044  | H240 | 0.25492  | -0.13123 | -0.6276  |
| C94  | 0.45049  | -0.23267 | -0.87549 | H241 | 0.24066  | -0.06972 | -0.60399 |
| C95  | 0.42778  | -0.20844 | -0.74206 | H242 | 0.1713   | -0.08081 | -1.2651  |
| C96  | 0.39075  | -0.21401 | -0.73782 | H243 | 0.18693  | -0.14323 | -1.29825 |
| C97  | 0.10382  | -0.32162 | -1.09003 | H244 | 0.38788  | -0.28936 | -1.10404 |
| C98  | 0.06733  | -0.33037 | -1.09375 | H245 | 0.45126  | -0.28052 | -1.10015 |
| C99  | 0.04381  | -0.31701 | -0.89684 | H246 | 0.43829  | -0.18689 | -0.64352 |
| C100 | 0.05816  | -0.29457 | -0.69468 | H247 | 0.37529  | -0.19618 | -0.63431 |
| C101 | 0.09487  | -0.28713 | -0.68428 | H248 | 0.11979  | -0.33156 | -1.23978 |
| C102 | 0.2611   | -0.41764 | -0.46874 | H249 | 0.05778  | -0.34671 | -1.24265 |
| C103 | 0.27045  | -0.45404 | -0.44914 | H250 | 0.04216  | -0.28379 | -0.54982 |
| C104 | 0.29464  | -0.46967 | -0.63306 | H251 | 0.10422  | -0.27201 | -0.52722 |

|      |         |          |          |      |         |          |          |
|------|---------|----------|----------|------|---------|----------|----------|
| C105 | 0.30995 | -0.44738 | -0.83091 | H252 | 0.24352 | -0.4073  | -0.33142 |
| C106 | 0.30033 | -0.41104 | -0.85309 | H253 | 0.25921 | -0.46899 | -0.29962 |
| N107 | 0.48634 | -0.22866 | -0.87465 | H254 | 0.32798 | -0.45786 | -0.96371 |
| N108 | 0.30382 | -0.50486 | -0.63762 | H255 | 0.31155 | -0.39597 | -1.00321 |
| C109 | 0.50522 | -0.19868 | -0.93165 | H256 | 0.49211 | -0.17699 | -1.00913 |
| C110 | 0.29345 | -0.53255 | -0.47865 | H257 | 0.27646 | -0.52754 | -0.32199 |
| N111 | 0.19316 | -1.03426 | -0.91972 | H258 | 0.21898 | -1.01435 | -0.58706 |
| C112 | 0.20184 | -1.00816 | -0.74005 | H259 | 0.64753 | -0.69445 | -1.10155 |
| C113 | 0.67147 | -0.70229 | -1.02497 | H260 | 0.70374 | -0.65937 | -1.15418 |
| C114 | 0.70207 | -0.68309 | -1.05237 | H261 | 0.83917 | -0.66741 | -0.84161 |
| C115 | 0.72941 | -0.70128 | -0.92142 | H262 | 0.87672 | -0.7225  | -0.72987 |
| N116 | 0.71483 | -0.73251 | -0.81563 | H263 | 0.83796 | -0.85882 | -0.55356 |
| C117 | 0.67886 | -0.73343 | -0.88128 | H264 | 0.78298 | -0.89449 | -0.52177 |
| C118 | 0.7639  | -0.68501 | -0.91901 | H265 | 0.64143 | -0.87578 | -0.60833 |
| C119 | 0.79496 | -0.70458 | -0.86456 | H266 | 0.60516 | -0.81937 | -0.70087 |
| C120 | 0.82988 | -0.69299 | -0.82871 | H267 | 0.80079 | -0.65292 | -1.31959 |
| C121 | 0.85005 | -0.72273 | -0.76632 | H268 | 0.81436 | -0.59031 | -1.36577 |
| C122 | 0.82701 | -0.75198 | -0.75423 | H269 | 0.7508  | -0.5673  | -0.69111 |
| N123 | 0.79552 | -0.73984 | -0.83335 | H270 | 0.73733 | -0.62981 | -0.63956 |
| C124 | 0.83302 | -0.78762 | -0.67547 | H271 | 0.87025 | -0.83235 | -0.9913  |
| C125 | 0.80447 | -0.81262 | -0.63194 | H272 | 0.93253 | -0.84601 | -0.97376 |
| C126 | 0.81325 | -0.84808 | -0.57811 | H273 | 0.94465 | -0.77747 | -0.30853 |
| C127 | 0.7829  | -0.86773 | -0.56139 | H274 | 0.88172 | -0.76576 | -0.30954 |
| C128 | 0.75364 | -0.84564 | -0.60592 | H275 | 0.59695 | -0.77863 | -1.17072 |
| N129 | 0.76739 | -0.81097 | -0.61965 | H276 | 0.53496 | -0.76299 | -1.14327 |
| C130 | 0.71888 | -0.86186 | -0.61743 | H277 | 0.55747 | -0.69363 | -0.49751 |
| C131 | 0.68785 | -0.84228 | -0.67688 | H278 | 0.61862 | -0.70948 | -0.52039 |
| C132 | 0.65193 | -0.85155 | -0.65801 | H279 | 0.68193 | -0.89642 | -0.22636 |
| C133 | 0.63218 | -0.82117 | -0.71039 | H280 | 0.66747 | -0.95905 | -0.20452 |

|      |         |          |          |       |         |          |          |
|------|---------|----------|----------|-------|---------|----------|----------|
| C134 | 0.65611 | -0.79401 | -0.77399 | H281  | 0.73161 | -0.97832 | -0.88306 |
| N135 | 0.68822 | -0.80878 | -0.76554 | H282  | 0.74348 | -0.9157  | -0.92281 |
| C136 | 0.65013 | -0.75779 | -0.83365 | H283  | 0.80789 | -0.5276  | -0.65805 |
| C137 | 0.76886 | -0.64776 | -0.96816 | H284  | 0.49762 | -0.69246 | -0.45542 |
| C138 | 0.86966 | -0.79729 | -0.65415 | H285  | 0.12355 | 1.77207  | 0.16701  |
| C139 | 0.7134  | -0.89941 | -0.58158 | H286  | 0.16087 | 1.82608  | 0.16136  |
| C140 | 0.61387 | -0.74659 | -0.84113 | H287  | 0.29192 | 1.85609  | -0.20839 |
| C141 | 0.79024 | -0.63521 | -1.18382 | H288  | 0.34971 | 1.81893  | -0.16411 |
| C142 | 0.79815 | -0.59852 | -1.2121  | H289  | 0.36544 | 1.69848  | 0.43852  |
| C143 | 0.78481 | -0.57318 | -1.0277  | H290  | 0.32861 | 1.64359  | 0.52035  |
| C144 | 0.7617  | -0.58529 | -0.82243 | H291  | 0.2022  | 1.59296  | 0.19796  |
| C145 | 0.75374 | -0.62197 | -0.79353 | H292  | 0.14425 | 1.62778  | 0.13387  |
| C146 | 0.88543 | -0.82095 | -0.84276 | Ni293 | 0.24789 | 0.72378  | -1.06958 |
| C147 | 0.92208 | -0.82893 | -0.83375 | Ni294 | 0.73907 | 1.23445  | -0.54496 |

**Table S6.** Fractional atomic coordinates for the unit cell of COF-BATA-TAPP-Zn with AA stacking.

|                                                                                                                   |         |          |          |      |         |          |          |
|-------------------------------------------------------------------------------------------------------------------|---------|----------|----------|------|---------|----------|----------|
| P1                                                                                                                |         |          |          |      |         |          |          |
| $a = 37.59969 \text{ \AA}, b = 37.16598 \text{ \AA}, c = 4.91175 \text{ \AA}, \alpha = \beta = \gamma = 90^\circ$ |         |          |          |      |         |          |          |
| C1                                                                                                                | 0.72102 | -0.23288 | -1.04502 | C148 | 0.93585 | -0.81145 | -0.62    |
| C2                                                                                                                | 0.69483 | -0.20608 | -1.00873 | C149 | 0.92074 | -0.78494 | -0.45067 |
| C3                                                                                                                | 0.67094 | -0.20701 | -0.78707 | C150 | 0.88405 | -0.77707 | -0.46211 |
| C4                                                                                                                | 0.67339 | -0.2369  | -0.61093 | C151 | 0.58097 | -0.75865 | -1.04873 |
| C5                                                                                                                | 0.6992  | -0.26393 | -0.64902 | C152 | 0.54451 | -0.75013 | -1.02083 |
| C6                                                                                                                | 0.72432 | -0.26256 | -0.86461 | C153 | 0.53229 | -0.72758 | -0.80958 |
| N7                                                                                                                | 0.6481  | -0.17871 | -0.74212 | C154 | 0.5581  | -0.71276 | -0.63228 |
| C8                                                                                                                | 0.75171 | -0.28904 | -0.89177 | C155 | 0.59434 | -0.72196 | -0.65505 |
| C9                                                                                                                | 0.78531 | -0.28091 | -1.00842 | C156 | 0.68486 | -0.91041 | -0.37367 |
| C10                                                                                                               | 0.8128  | -0.30665 | -1.02386 | C157 | 0.67778 | -0.94758 | -0.35199 |
| C11                                                                                                               | 0.80907 | -0.34185 | -0.91619 | C158 | 0.6944  | -0.97252 | -0.52649 |

|     |         |          |          |      |         |          |          |
|-----|---------|----------|----------|------|---------|----------|----------|
| C12 | 0.77529 | -0.35011 | -0.80404 | C159 | 0.71906 | -0.95936 | -0.71969 |
| C13 | 0.74733 | -0.32487 | -0.79724 | C160 | 0.72565 | -0.92214 | -0.74552 |
| N14 | 0.83695 | -0.36628 | -0.91407 | N161 | 0.79189 | -0.53558 | -1.09855 |
| C15 | 0.61283 | -0.18497 | -0.79978 | N162 | 0.49654 | -0.72179 | -0.78942 |
| C16 | 0.66092 | -0.14475 | -0.671   | C163 | 0.80358 | -0.51476 | -0.88958 |
| C17 | 0.8305  | -0.40277 | -0.92443 | C164 | 0.47771 | -0.70544 | -0.58798 |
| C18 | 0.87157 | -0.35468 | -0.88345 | C165 | 0.14554 | 1.76594  | -0.04298 |
| C19 | 0.84603 | -0.42638 | -0.73218 | C166 | 0.1634  | 1.79772  | -0.05526 |
| C20 | 0.8376  | -0.46327 | -0.72638 | C167 | 0.19873 | 1.792    | 0.01847  |
| C21 | 0.81321 | -0.47822 | -0.91409 | N168 | 0.20083 | 1.75639  | 0.10553  |
| C22 | 0.79866 | -0.4552  | -1.11436 | C169 | 0.1683  | 1.73955  | 0.05783  |
| C23 | 0.80722 | -0.41817 | -1.11893 | C170 | 0.22381 | 1.82094  | -0.00599 |
| C24 | 0.89952 | -0.36745 | -1.05067 | C171 | 0.2606  | 1.81461  | -0.03337 |
| C25 | 0.93492 | -0.3556  | -1.01546 | C172 | 0.28844 | 1.83872  | -0.08118 |
| C26 | 0.94384 | -0.33038 | -0.81056 | C173 | 0.31987 | 1.82004  | -0.04371 |
| C27 | 0.91595 | -0.31761 | -0.64268 | C174 | 0.31069 | 1.78479  | 0.02541  |
| C28 | 0.88073 | -0.32969 | -0.67783 | N175 | 0.27558 | 1.78262  | 0.00234  |
| C29 | 0.59652 | -0.16801 | -1.02529 | C176 | 0.33203 | 1.75633  | 0.11907  |
| C30 | 0.56014 | -0.17312 | -1.0859  | C177 | 0.31795 | 1.72199  | 0.19901  |
| C31 | 0.53874 | -0.19626 | -0.9264  | C178 | 0.34182 | 1.69444  | 0.25942  |
| C32 | 0.5549  | -0.21345 | -0.70173 | C179 | 0.32318 | 1.66367  | 0.30695  |
| C33 | 0.59108 | -0.20773 | -0.63968 | C180 | 0.287   | 1.67049  | 0.27091  |
| C34 | 0.63845 | -0.11425 | -0.63427 | N181 | 0.28415 | 1.70767  | 0.24206  |
| C35 | 0.65184 | -0.07913 | -0.59305 | C182 | 0.26254 | 1.64071  | 0.27577  |
| C36 | 0.68882 | -0.07254 | -0.58395 | C183 | 0.22594 | 1.64451  | 0.22099  |
| C37 | 0.71154 | -0.10272 | -0.59533 | C184 | 0.19803 | 1.61968  | 0.237    |
| C38 | 0.69784 | -0.13763 | -0.63302 | C185 | 0.16669 | 1.63821  | 0.19359  |
| N39 | 0.68472 | -0.00768 | -0.50727 | C186 | 0.17583 | 1.67387  | 0.13907  |
| C40 | 0.70348 | -0.03754 | -0.57462 | N187 | 0.21112 | 1.67524  | 0.14301  |



|     |         |          |          |      |         |          |          |
|-----|---------|----------|----------|------|---------|----------|----------|
| N41 | 1.0068  | -0.32699 | -0.93054 | C188 | 0.15411 | 1.704    | 0.09297  |
| C42 | 0.97897 | -0.31799 | -0.76784 | H189 | 0.73768 | -0.23029 | -1.20819 |
| C43 | 0.18929 | -0.7821  | -0.45281 | H190 | 0.69347 | -0.18514 | -1.14317 |
| C44 | 0.16262 | -0.80884 | -0.46943 | H191 | 0.65707 | -0.2388  | -0.44636 |
| C45 | 0.16469 | -0.83724 | -0.66116 | H192 | 0.69991 | -0.28424 | -0.5088  |
| C46 | 0.19437 | -0.83702 | -0.83946 | H193 | 0.79065 | -0.25572 | -1.08092 |
| C47 | 0.22132 | -0.81083 | -0.82196 | H194 | 0.83623 | -0.29918 | -1.11227 |
| C48 | 0.21927 | -0.78314 | -0.62654 | H195 | 0.77069 | -0.37498 | -0.72285 |
| N49 | 0.14023 | -0.86498 | -0.66721 | H196 | 0.72352 | -0.33329 | -0.71981 |
| C50 | 0.24666 | -0.75724 | -0.61054 | H197 | 0.86329 | -0.41651 | -0.59008 |
| C51 | 0.242   | -0.72293 | -0.72722 | H198 | 0.84927 | -0.47912 | -0.58079 |
| C52 | 0.2695  | -0.69724 | -0.71641 | H199 | 0.7813  | -0.46523 | -1.25595 |
| C53 | 0.30274 | -0.70427 | -0.58918 | H200 | 0.79606 | -0.4021  | -1.26449 |
| C54 | 0.30683 | -0.73897 | -0.47269 | H201 | 0.89405 | -0.38558 | -1.20106 |
| C55 | 0.27951 | -0.76503 | -0.48364 | H202 | 0.95428 | -0.36557 | -1.14119 |
| N56 | 0.329   | -0.67821 | -0.57257 | H203 | 0.92103 | -0.29941 | -0.49095 |
| C57 | 0.1534  | -0.89954 | -0.6842  | H204 | 0.86143 | -0.32026 | -0.55023 |
| C58 | 0.10382 | -0.85938 | -0.65178 | H205 | 0.61141 | -0.1515  | -1.14639 |
| C59 | 0.36478 | -0.68651 | -0.57619 | H206 | 0.54939 | -0.15976 | -1.24863 |
| C60 | 0.31963 | -0.64256 | -0.54307 | H207 | 0.54029 | -0.23036 | -0.58093 |
| C61 | 0.38834 | -0.67062 | -0.38616 | H208 | 0.6012  | -0.22004 | -0.47186 |
| C62 | 0.42518 | -0.67712 | -0.39237 | H209 | 0.61147 | -0.1171  | -0.64056 |
| C63 | 0.44043 | -0.70025 | -0.58905 | H210 | 0.63436 | -0.05814 | -0.57527 |
| C64 | 0.41707 | -0.71702 | -0.77623 | H211 | 0.73852 | -0.09956 | -0.57873 |
| C65 | 0.38    | -0.71025 | -0.76943 | H212 | 0.71593 | -0.15807 | -0.63583 |
| C66 | 0.33429 | -0.61521 | -0.70904 | H213 | 0.72977 | -0.03457 | -0.62447 |
| C67 | 0.32471 | -0.5788  | -0.67499 | H214 | 0.98349 | -0.3015  | -0.60475 |
| C68 | 0.29998 | -0.56832 | -0.47262 | H215 | 0.18696 | -0.7621  | -0.3106  |
| C69 | 0.28537 | -0.59557 | -0.30551 | H216 | 0.14172 | -0.80794 | -0.33652 |

|     |          |          |          |      |          |          |          |
|-----|----------|----------|----------|------|----------|----------|----------|
| C70 | 0.29511  | -0.63185 | -0.34071 | H217 | 0.19671  | -0.85654 | -0.9838  |
| C71 | 0.14083  | -0.92437 | -0.88023 | H218 | 0.24243  | -0.8121  | -0.95342 |
| C72 | 0.15409  | -0.95986 | -0.89356 | H219 | 0.21858  | -0.71646 | -0.82178 |
| C73 | 0.18068  | -0.97178 | -0.71077 | H220 | 0.2648   | -0.67272 | -0.80183 |
| C74 | 0.19361  | -0.94692 | -0.51642 | H221 | 0.32998  | -0.74544 | -0.37539 |
| C75 | 0.18017  | -0.91165 | -0.50398 | H222 | 0.28369  | -0.78975 | -0.39744 |
| C76 | 0.08093  | -0.88504 | -0.52793 | H223 | 0.37857  | -0.65384 | -0.23978 |
| C77 | 0.04372  | -0.88101 | -0.52324 | H224 | 0.44082  | -0.66458 | -0.2502  |
| C78 | 0.0273   | -0.85036 | -0.63735 | H225 | 0.42704  | -0.73422 | -0.92001 |
| C79 | 0.04959  | -0.82373 | -0.75212 | H226 | 0.36394  | -0.72244 | -0.9097  |
| C80 | 0.08694  | -0.82843 | -0.76165 | H227 | 0.3521   | -0.62184 | -0.85738 |
| N81 | -0.02842 | -0.81691 | -0.60609 | H228 | 0.33591  | -0.55989 | -0.80013 |
| C82 | -0.01017 | -0.84806 | -0.63978 | H229 | 0.26744  | -0.5893  | -0.15584 |
| C83 | 0.21391  | -0.14201 | -0.98992 | H230 | 0.28423  | -0.65084 | -0.21676 |
| C84 | 0.36905  | -0.23579 | -0.86612 | H231 | 0.12174  | -0.91645 | -1.01496 |
| C85 | 0.27387  | -0.39539 | -0.67642 | H232 | 0.14417  | -0.97705 | -1.03771 |
| C86 | 0.11677  | -0.30284 | -0.91561 | H233 | 0.2129   | -0.95428 | -0.37999 |
| C87 | 0.22809  | -0.12109 | -0.77446 | H234 | 0.18999  | -0.89459 | -0.36007 |
| C88 | 0.22019  | -0.0843  | -0.74661 | H235 | 0.09133  | -0.90759 | -0.44042 |
| C89 | 0.19634  | -0.06704 | -0.92624 | H236 | 0.02867  | -0.90078 | -0.43462 |
| C90 | 0.18232  | -0.08745 | -1.14272 | H237 | 0.03856  | -0.80102 | -0.83463 |
| C91 | 0.19162  | -0.12398 | -1.17804 | H238 | 0.10195  | -0.80902 | -0.8537  |
| C92 | 0.39371  | -0.25002 | -1.05539 | H239 | -0.02424 | -0.8715  | -0.6609  |
| C93 | 0.43025  | -0.24142 | -1.03814 | H240 | 0.24469  | -0.13261 | -0.6336  |
| C94 | 0.44308  | -0.21838 | -0.83168 | H241 | 0.23184  | -0.07055 | -0.59088 |
| C95 | 0.41858  | -0.20421 | -0.64326 | H242 | 0.16533  | -0.07551 | -1.27806 |
| C96 | 0.38212  | -0.21273 | -0.65993 | H243 | 0.18199  | -0.13723 | -1.34479 |
| C97 | 0.10147  | -0.32594 | -1.11284 | H244 | 0.38513  | -0.26678 | -1.20736 |
| C98 | 0.06469  | -0.33347 | -1.11177 | H245 | 0.44762  | -0.25223 | -1.17567 |

|      |         |          |          |      |         |          |          |
|------|---------|----------|----------|------|---------|----------|----------|
| C99  | 0.0418  | -0.31777 | -0.91796 | H246 | 0.4273  | -0.18739 | -0.4925  |
| C100 | 0.05685 | -0.29389 | -0.72556 | H247 | 0.36505 | -0.20189 | -0.51993 |
| C101 | 0.0937  | -0.28675 | -0.7233  | H248 | 0.11716 | -0.33764 | -1.25859 |
| C102 | 0.26049 | -0.41565 | -0.45485 | H249 | 0.05445 | -0.35064 | -1.25457 |
| C103 | 0.26845 | -0.45251 | -0.42637 | H250 | 0.04122 | -0.28163 | -0.58352 |
| C104 | 0.29151 | -0.46996 | -0.61105 | H251 | 0.10368 | -0.26973 | -0.57823 |
| C105 | 0.30664 | -0.44941 | -0.82208 | H252 | 0.24407 | -0.40375 | -0.31481 |
| C106 | 0.29761 | -0.4129  | -0.8568  | H253 | 0.25714 | -0.46641 | -0.26966 |
| N107 | 0.47793 | -0.20981 | -0.80015 | H254 | 0.32389 | -0.46132 | -0.9557  |
| N108 | 0.29988 | -0.50547 | -0.60544 | H255 | 0.30829 | -0.3992  | -1.01821 |
| C109 | 0.50268 | -0.2022  | -0.99277 | H256 | 0.49489 | -0.19986 | -1.19194 |
| C110 | 0.28946 | -0.53219 | -0.43532 | H257 | 0.27298 | -0.52624 | -0.27588 |
| N111 | 0.18581 | -1.03216 | -0.90357 | H258 | 0.2115  | -1.01405 | -0.56027 |
| C112 | 0.19435 | -1.00713 | -0.71304 | H259 | 0.63752 | -0.68513 | -1.00291 |
| C113 | 0.66239 | -0.69587 | -0.98215 | H260 | 0.69253 | -0.64954 | -1.062   |
| C114 | 0.69268 | -0.67626 | -1.01385 | H261 | 0.83438 | -0.66838 | -0.98119 |
| C115 | 0.72202 | -0.6984  | -0.96846 | H262 | 0.87052 | -0.72388 | -0.84626 |
| N116 | 0.70845 | -0.73319 | -0.94076 | H263 | 0.82646 | -0.84567 | -0.38105 |
| C117 | 0.67141 | -0.73134 | -0.92079 | H264 | 0.77071 | -0.88248 | -0.349   |
| C118 | 0.75682 | -0.68219 | -0.96634 | H265 | 0.63731 | -0.87779 | -0.72349 |
| C119 | 0.7878  | -0.70134 | -0.89577 | H266 | 0.59947 | -0.82234 | -0.83298 |
| C120 | 0.82379 | -0.69219 | -0.91718 | H267 | 0.79272 | -0.65061 | -1.37979 |
| C121 | 0.84342 | -0.72203 | -0.8424  | H268 | 0.80906 | -0.58814 | -1.42099 |
| C122 | 0.81929 | -0.74871 | -0.76628 | H269 | 0.74769 | -0.56345 | -0.73188 |
| N123 | 0.78717 | -0.73406 | -0.78737 | H270 | 0.73321 | -0.62594 | -0.67629 |
| C124 | 0.82511 | -0.78439 | -0.68336 | H271 | 0.86097 | -0.83579 | -0.95022 |
| C125 | 0.79633 | -0.8089  | -0.63565 | H272 | 0.92327 | -0.84973 | -0.92418 |
| C126 | 0.80311 | -0.83903 | -0.47475 | H273 | 0.93662 | -0.77127 | -0.31691 |
| C127 | 0.7728  | -0.8591  | -0.45768 | H274 | 0.87397 | -0.75782 | -0.33468 |

|      |         |          |          |       |         |          |          |
|------|---------|----------|----------|-------|---------|----------|----------|
| C128 | 0.74626 | -0.84214 | -0.60856 | H275  | 0.58878 | -0.77507 | -1.20523 |
| N129 | 0.76085 | -0.81079 | -0.71609 | H276  | 0.5266  | -0.76071 | -1.15567 |
| C130 | 0.71218 | -0.85926 | -0.62353 | H277  | 0.55086 | -0.69534 | -0.48186 |
| C131 | 0.68107 | -0.83996 | -0.68491 | H278  | 0.61194 | -0.71148 | -0.51687 |
| C132 | 0.64637 | -0.85191 | -0.73027 | H279  | 0.67249 | -0.89307 | -0.24215 |
| C133 | 0.62603 | -0.82197 | -0.79121 | H280  | 0.66027 | -0.95657 | -0.20787 |
| C134 | 0.6489  | -0.79232 | -0.79414 | H281  | 0.73165 | -0.97675 | -0.84865 |
| N135 | 0.68031 | -0.8044  | -0.71148 | H282  | 0.74298 | -0.91353 | -0.89257 |
| C136 | 0.64293 | -0.75622 | -0.86566 | H283  | 0.80624 | -0.5264  | -0.70124 |
| C137 | 0.76253 | -0.64481 | -1.01735 | H284  | 0.4913  | -0.69604 | -0.42216 |
| C138 | 0.86142 | -0.7947  | -0.65036 | H285  | 0.11953 | 1.76312  | -0.09995 |
| C139 | 0.70791 | -0.8969  | -0.57789 | H286  | 0.1514  | 1.82084  | -0.11558 |
| C140 | 0.60647 | -0.74556 | -0.86108 | H287  | 0.28636 | 1.86544  | -0.12749 |
| C141 | 0.78341 | -0.6326  | -1.23893 | H288  | 0.34487 | 1.83068  | -0.05633 |
| C142 | 0.79281 | -0.59598 | -1.26511 | H289  | 0.36893 | 1.69575  | 0.26718  |
| C143 | 0.78078 | -0.57025 | -1.07594 | H290  | 0.33509 | 1.63992  | 0.35753  |
| C144 | 0.75781 | -0.5818  | -0.86622 | H291  | 0.19965 | 1.59285  | 0.27907  |
| C145 | 0.74912 | -0.61848 | -0.83597 | H292  | 0.14173 | 1.62746  | 0.20363  |
| C146 | 0.87649 | -0.82206 | -0.81435 | Zn293 | 1.24042 | 0.73693  | -0.65274 |
| C147 | 0.91309 | -0.83035 | -0.79907 | Zn294 | 1.73711 | 1.2209   | -0.00213 |
